# Supplementary material for: Development of a physical activity monitoring tool for Thai medical schools: a protocol for a mixed methods study
Source: PubMed Central journal article supplement — BMJ Open. 2017 Sep 27;7(9):e017297. doi: 10.1136/bmjopen-2017-017297 (PMC5623551; doi:10.1136/bmjopen-2017-017297), 2017-09-27
Supplement: bmjopen-2017-017297.draft_revisions.pdf [file bmjopen-2017-017297.draft_revisions.pdf]

# BMJ Open

BMJ Open is committed to open peer review. As part of this commitment we make the peer review history of every article we publish publicly available.

When an article is published we post the peer reviewers' comments and the authors' responses online. We also post the versions of the paper that were used during peer review. These are the versions that the peer review comments apply to.

The versions of the paper that follow are the versions that were submitted during the peer review process. They are not the versions of record or the final published versions. They should not be cited or distributed as the published version of this manuscript.

BMJ Open is an open access journal and the full, final, typeset and author-corrected version of record of the manuscript is available on our site with no access controls, subscription charges or pay-per-view fees (<http://bmjopen.bmj.com>).

If you have any questions on BMJ Open's open peer review process please email [editorial.bmjopen@bmj.com](mailto:editorial.bmjopen@bmj.com)

# BMJ Open

## Development of the Medical School Physical Activity Report Card (MSPARC): a protocol for a mixed methods study to explore the medical school physical activity situations

|                                 |                                                                                                                                                                                                                                                                                                                                                                                                                      |
|---------------------------------|----------------------------------------------------------------------------------------------------------------------------------------------------------------------------------------------------------------------------------------------------------------------------------------------------------------------------------------------------------------------------------------------------------------------|
| Journal:                        | <i>BMJ Open</i>                                                                                                                                                                                                                                                                                                                                                                                                      |
| Manuscript ID                   | bmjopen-2017-017297                                                                                                                                                                                                                                                                                                                                                                                                  |
| Article Type:                   | Protocol                                                                                                                                                                                                                                                                                                                                                                                                             |
| Date Submitted by the Author:   | 13-Apr-2017                                                                                                                                                                                                                                                                                                                                                                                                          |
| Complete List of Authors:       | Wattanapisit, Apichai; School of Medicine, Walailak University , Vjijtpongjinda, Surasak ; School of Medicine, Walailak University Saengow, Udomsak; School of Medicine, Walailak University Amaek, Waluka ; School of Architecture and Design, Walailak University Thanamee, Sanhapan; Chiang Mai University, Family of Medicine, Faculty of Medicine Petchuay, Prachyapan ; Walailak University School of Medicine |
| <b>Primary Subject Heading</b>: | Medical education and training                                                                                                                                                                                                                                                                                                                                                                                       |
| Secondary Subject Heading:      | Health policy, Public health                                                                                                                                                                                                                                                                                                                                                                                         |
| Keywords:                       | Education metrics, Medical school, Medical students, Physical activity, Policy, Report card                                                                                                                                                                                                                                                                                                                          |
|                                 |                                                                                                                                                                                                                                                                                                                                                                                                                      |

SCHOLARONE™  
Manuscripts

**Title:** Development of the Medical School Physical Activity Report Card (MSPARC): a protocol for a mixed methods study to explore the medical school physical activity situations

**Authors:**

Apichai Wattanapisit, MD<sup>1,2</sup>

Surasak Vijitpongjinda, MD<sup>1,2</sup>

Udomsak Saengow, MD, PhD<sup>1,2</sup>

Waluka Amaek, M.Arch. (Industrial Design)<sup>3</sup>

Sanhapan Thanamee, MD<sup>4</sup>

Prachyapan Petchuay, MD, PhD<sup>1</sup>

<sup>1</sup> School of Medicine, Walailak University, Thasala, Nakhon Si Thammarat, 80161, Thailand

<sup>2</sup> Center of Excellence in Health System and Medical Research, Walailak University, Thasala, Nakhon Si Thammarat, 80161, Thailand

<sup>3</sup> School of Architecture and Design Walailak University, Thasala, Nakhon Si Thammarat, 80161, Thailand

<sup>4</sup> Department of Family Medicine, Faculty of Medicine, Chiang Mai University, Chiang Mai, 50200, Thailand

**Correspondence to** Apichai Wattanapisit; [apichai.wa@wu.ac.th](mailto:apichai.wa@wu.ac.th)

Contact number: (+66)-8-6706-0440

**Keywords:** Medical school; medical students; physical activity; policy; report card

**Word count:** 2,168 (excluding title page, 272 words of abstract, 32 references, 1 box and 1 table)

## ABSTRACT

**Introduction:** Physical activity (PA) is important in promoting health as well as in the treatment and prevention of diseases. However, insufficient PA is still a global health problem and it is also a problem in medical schools. PA training in medical curricula is still sparse or non-existent. There is a need for a comprehensive understanding of PA situations in medical schools through several indicators, including people, place, and policy. This study will include a survey of the PA situations in a medical school and development of a tool, the Medical School Physical Activity Report Card (MSPARC), for exploring, monitoring and reporting the information relating to PA situations.

**Methods and analysis:** This mixed methods study will run from January to September 2017. We will involve the School of Medicine, Walailak University, Thailand and its medical students (n=285). Data collection will consist of both primary and secondary data, divided into 4 parts: general information, people, place and policy. We will investigate the PA situations about (1) people: the prevalence of PA and sedentary behaviours; (2) place: the quality and accessibility of walkable neighbourhoods, bicycle facilities and recreational areas; and (3) policy: PA promotion programmes for medical students, education metrics and investment related to PA. The MSPARC will be developed using simple symbols, infographics and short texts to represent the PA situations of the medical school.

**Ethics and dissemination:** This study has been approved by the Human Research Ethics Committee Walailak University (protocol number: WUEC-16-005-01). Findings will be published in peer-reviewed journals and presented at national or international conferences. The MSPARC and full report will be disseminated to relevant stakeholders, policymakers, staff and clients.

## STRENGTHS AND LIMITATIONS OF THIS STUDY

- This study includes comprehensive metrics about physical activity (PA) situations in a medical school.
- The Medical School Physical Activity Report Card (MSPARC) will be an innovative product for exploring, monitoring and reporting the related information to PA situations.
- The MSPARC will provide concise and understandable infographics and information on PA situations of the medical school. Users can read the results at a glance.
- The study is limited by its cross-sectional design in only one medical school. However, the methodology can be adopted for subsequent surveys and for other medical schools. The data collection is adjustable for each medical school.

## INTRODUCTION

Physical inactivity is one of the global health challenges. The estimated prevalence of physical inactivity is 23.3% among adults, 76.3% in adolescents, 78.4% for boys and 84.4% for girls.[1] The pandemic of physical inactivity involves mortality, morbidity and economic costs.[2] Globally, physical inactivity causes 9% of premature mortality or more than 5.3 million deaths each year, 6% of the burden of disease from coronary heart disease, 7% of type 2 diabetes mellitus, 10% of breast cancer, and 10% of colon cancer.[3] Economically, the estimated healthcare costs of physical inactivity was \$53.8 billion in 2013.[2] The World Health Organization (WHO) aims to reduce physical inactivity by 10% by 2025.[4] In response to this goal, the global recommendations on PA for health was launched in 2010.[5] Battling against physical inactivity or striving to increase PA requires understanding of multiple layers and associations among individual aspects, environmental aspects and public policies.[6, 7] It also needs a multi-sectoral, multidisciplinary and public-health response.[8]

In Thailand, about one-third (30%) of Thai adults are physically inactive, and 5.1% of mortality is due to physical inactivity.[9] It is a challenging task to reduce physical inactivity. In 2015, the 1<sup>st</sup> National Conference on Physical Activity (NCPA 2015) was held in the country. Its slogan was 'Active Living for All' and comprised an active people, active place and active policy.[10] In 2016, the International Society for Physical Activity and Health (ISPAH) arranged an international conference, the 6<sup>th</sup> International Congress on Physical Activity and Public Health 2016, in Thailand under the same theme as the NCPA 2015, 'Active Living for All: Active People, Active Place, Active Policy'. [11] Consequently, PA campaigns have been widely promoted beyond individual involvement. A nationwide PA campaign was announced by the Prime Minister to instruct all government agencies to arrange exercise sessions every Wednesday from 15:00 to 16:30 pm.[12] Additionally,

1  
2  
3 regular monitoring and reporting on progress of PA, its determinants and policy  
4 implementation are stated as a sustainable development goal.[13]  
5  
6  
7

8  
9  
10 The national concern about promoting PA and reducing physical inactivity has emerged,  
11 especially in the healthcare system. In terms of manpower, it is assumed that medical students  
12 and physicians are more likely to be physically active compared with general populations,[14,  
13 15] and might be the ideal healthy population. Nevertheless, physical inactivity is still a  
14 problem among medical students. A previous study showed that more than half (50.5%) of  
15 medical students in Southern Thailand are physically inactive.[16] The evidence supports a  
16 strong association between personal PA behaviours of medical students and PA counselling  
17 attitudes and practices.[17, 18] However, teaching and training about basic knowledge and  
18 skills to promote PA in medical schools is still sparse or non-existent.[19, 20] This issue is  
19 not only an individual concern; it is also a substantial issue in health promotion among  
20 medical schools and in medical student education. Nevertheless, there is a gap in the  
21 understanding of PA situations and its determinants in medical schools.  
22  
23  
24  
25  
26  
27  
28  
29  
30  
31  
32  
33  
34  
35  
36  
37

38 Comprehensive exploration and monitoring is an approach to increase PA in different  
39 populations. The previous evidence suggests PA report cards have been successful to get  
40 people moving.[21] The Global Observatory for Physical Activity (GoPA) have launched  
41 country cards presenting the information on country specific PA profiles for surveillance of  
42 PA prevalence and relevant situations.[22, 23] The Report Card on Physical Activity for  
43 Children and Youth, PA surveillance among children, has been released annually since 2005  
44 to assess PA situations.[21, 24] This approach might be beneficial for medical schools.  
45 Therefore, a specific PA report card for medical school might be an effective tool for  
46 exploring, monitoring and reporting the situations of PA in a particular medical school.  
47  
48  
49  
50  
51  
52  
53  
54  
55  
56  
57  
58  
59  
60

1  
2  
3  
4  
5 We still do not have a study protocol to explore the PA situations in medical school, hence  
6  
7 our research team will focus on exploring the PA situations in a medical school and  
8  
9 developing a tool for exploring, monitoring and reporting the information relating to PA  
10  
11 situations. This paper describes the study design and the development of the Medical School  
12  
13 Physical Activity Report Card (MSPARC).  
14

### 15 16 17 18 **Aims and objectives** 19

20  
21 The primary aims are:

- 22  
23 (1) To explore the PA situations of a medical school, including people, place and  
24  
25 policy.  
26
- 27  
28 (2) To develop the MSPARC for monitoring and reporting the PA situations to clients  
29  
30 (medical students), staff, policymakers and stakeholders.  
31

32  
33  
34 Secondary aim is to develop the MSPARC protocol for further surveillance and for other  
35  
36 medical schools.  
37  
38

## 39 40 41 **METHODS AND ANALYSIS** 42

### 43 44 **Study design** 45

46 A mixed methods study will be conducted. The study consists of both quantitative and  
47  
48 qualitative approaches. Quantitatively, a cross-sectional observational study will be  
49  
50 implemented to survey the relevant outcomes, including the prevalence of PA, the prevalence  
51  
52 of sedentary behaviours, and the quality and accessibility of active environments.  
53  
54 Qualitatively, a case study will focus on an in-depth description to develop a detailed analysis  
55  
56  
57  
58  
59  
60



1  
2  
3 of the medical school policies.[25] The study will occur in a 9-month period (from January to  
4  
5 September 2017).  
6  
7

### 8 9 **Setting and participants**

10  
11 The study will involve the medical students in three campuses of the School of Medicine,  
12  
13 Walialak University, Thailand (in Nakhon Si Thammarat main campus, Trang Hospital and  
14  
15 Vachira Phuket Hospital). All the preclinical years (years 1-3) study at the main campus. The  
16  
17 rest of the medical students (clinical years, years 4-6) receive clinical training and hospital  
18  
19 attachments at Trang Hospital and Vachira Phuket Hospital. The total number of medical  
20  
21 students is 285, with 46-48 students in each class.  
22  
23  
24  
25  
26  
27

### 28 **Data collection**

29  
30 Data collection will consist of both primary and secondary data, divided into 4 parts: general  
31  
32 information, people, place and policy.  
33  
34  
35  
36

### 37 **General information**

38  
39 The information will include the land area of the medical school (only main campus), number  
40  
41 of students and annual tuition fee. All the information will be reviewed from the recent  
42  
43 university and/or faculty documents.  
44  
45  
46  
47

### 48 **People**

49  
50 The secondary data on the participation of medical students in PA, using the Global Physical  
51  
52 Activity Questionnaire (GPAQ) including activities at work, travelling activities, and  
53  
54 recreational activities,[26] will be gathered from the previous survey in 2016.[16] PA in this  
55  
56 meaning is sufficient PA behaviours or the WHO recommended PA levels (any activities  
57  
58  
59  
60

1  
2  
3 which are equal to 150 minutes of moderate-intensity PA throughout the week or 75 minutes  
4  
5 of vigorous-intensity PA throughout the week, or combined (or an equivalent combination of)  
6  
7 moderate- and vigorous-intensity PA).[5] We will focus on the PA prevalence of the whole  
8  
9 population and the prevalence by sex.  
10

11  
12  
13  
14 Sedentary time, collected by using the GPAQ, refers to time spent sitting during waking  
15  
16 hours.[26] We will define sedentary behaviour using the cut-off point of  $\geq 8$  hours per day of  
17  
18 sedentary time.  
19

### 20 21 22 23 **Place**

24  
25 We will assess the places related to active transportation and recreational PA in the main  
26  
27 campus. Active transportation refers to 'walking and cycling for transportation', 'non-  
28  
29 motorised transport' and 'human powered transport'.[27] Recreational PA means a PA that  
30  
31 people engage in during their free time, that people enjoy, and that people recognise as  
32  
33 having socially redeeming values.[28] Both active transportation and recreational activities  
34  
35 are associated with natural and built environments.[27, 29-31]  
36  
37  
38  
39

40  
41 The data on PA related places, including walkable neighbourhoods, bicycle facilities and  
42  
43 recreational environments, will be collected from the preclinical students (n=144) by using a  
44  
45 self-administered questionnaire developed by the research team. Box 1 shows the questions  
46  
47 to survey places for PA.  
48  
49

### 50 51 52 **Box 1** Questions to survey places for physical activity 53 54 55 56 57 58 59 60

1  
2  
3  
4  
5  
6  
7  
8  
9  
10  
11  
12  
13  
14  
15  
16  
17  
18  
19  
20  
21  
22  
23  
24  
25  
26  
27  
28  
29  
30  
31  
32  
33  
34  
35  
36  
37  
38  
39  
40  
41  
42  
43  
44  
45  
46  
47  
48  
49  
50  
51  
52  
53  
54  
55  
56  
57  
58  
59  
60

1. Usage: Do you use this type of place\*?

Yes (go to item 1.1)

No (go to item 1.2)

1.1 How often do you use this type of place\*?

Sometimes (1-2 day/week)

Often (3-4 days/week)

Always (5-7 days/week)

1.2 Why do you not use this type of place\*? (select 1 or more answers)

Not interested/dissatisfied

Unsafe

Unavailable/inconvenient

Other reason (please specify)

2. Quality: How much do you rate the quality of this type of place\*?

An 11-point scale, with end-points at 0 (least) and 10 (most) will be provided.

3. Accessibility: How much do you rate the accessibility of this type of place\*?

An 11-point scale, with end-points at 0 (least) and 10 (most) will be provided.

\*This type of place refers to walkable neighbourhoods, bicycle facilities and recreational areas

## Policy

We will collect the data on PA promotion programmes for medical students from the School of Medicine annual plans and reports. The data will include the number and name of programmes or projects related to PA promotion for medical students. The investment related to PA (amount of expense) will be collected.

As the Thai national medical competency issued by the Medical Council of Thailand, medical students have to learn about approaches of health promotion included exercise.[32] The criteria does not specify particular aspects about PA education and training. The school

1  
2  
3 curriculum will be reviewed to explore the education metrics regarding the following topics:  
4  
5 basic knowledge of PA, PA and public health, and PA counselling.  
6  
7  
8

## 9 10 **Data analysis**

### 11 12 **People**

13  
14 We will reanalyse the data from the previous survey.[16] The prevalence of PA will be  
15  
16 calculated by dividing the number of participants who met the recommended PA levels with  
17  
18 the total number of participants. For each sex, the prevalence will be calculated by dividing  
19  
20 the number of a particular sex who met the recommended PA levels with the total number of  
21  
22 the same sex.  
23  
24  
25  
26

27  
28 The prevalence of sedentary behaviours will be calculated by dividing the number of  
29  
30 participants who engage in  $\geq 8$  hours/day of sedentary time with the total number of  
31  
32 participants, and the prevalence of sedentary behaviours for each sex will be analysed.  
33  
34  
35

### 36 37 **Place**

38  
39 We will use descriptive statistics, including frequencies and percentages, describing the usage  
40  
41 of each type of place. The quality and accessibility of walkable neighbourhoods, bicycle  
42  
43 facilities and recreational areas will be calculated from the 11-point scales as mean scores.  
44  
45  
46

### 47 48 **Policy**

49  
50 Two investigators will independently review the relevant documents to find out the PA  
51  
52 promotion programmes for medical students. Two investigators will analyse the education  
53  
54 metrics from the school curriculum to discover the lectures, active learning sessions or  
55  
56 clinical teaching topics about basic knowledge of PA, PA and public health, and PA  
57  
58  
59  
60

counselling. Any differences in the analyses will be resolved through consensus. The analysis will confirmed by the research team members.

For the investment related to PA, we will calculate (1) the annual investment in PA programmes, (2) per capita investment (dividing the annual investment with the total number of medical students) and (3) ratio of per capita investment to annual tuition fee (dividing the per capita investment by the annual tuition fee).

### Development of the Medical School Physical Activity Report Card

The indicators of the MSPARC will consist of 5 parts: general information, people, place, policy and surveillance (Table 1). We will design simple and concise report cards in Thai and English versions using uncomplicated symbols, infographics and short texts.

**Table 1** Data indicators of the Medical School Physical Activity Report Card

|                     |                                                                                                                                                                                                                                                              |
|---------------------|--------------------------------------------------------------------------------------------------------------------------------------------------------------------------------------------------------------------------------------------------------------|
| General information | Land area (km <sup>2</sup> )<br>Number of students (people)<br>Tuition fee (Baht/academic year)                                                                                                                                                              |
| People              | Prevalence of physical activity <ul style="list-style-type: none"> <li>• Total (%)</li> <li>• Male (%)</li> <li>• Female (%)</li> </ul> Prevalence of sedentary behaviours <ul style="list-style-type: none"> <li>• Total (%)</li> <li>• Male (%)</li> </ul> |

|              |                                                                                                                                                                                                                                                                                                                                                                                                                                                                                                                                                                                                                                                      |
|--------------|------------------------------------------------------------------------------------------------------------------------------------------------------------------------------------------------------------------------------------------------------------------------------------------------------------------------------------------------------------------------------------------------------------------------------------------------------------------------------------------------------------------------------------------------------------------------------------------------------------------------------------------------------|
|              | <ul style="list-style-type: none"> <li>• Female (%)</li> </ul>                                                                                                                                                                                                                                                                                                                                                                                                                                                                                                                                                                                       |
| Place        | <p>Walkable neighbourhoods</p> <ul style="list-style-type: none"> <li>• Quality (mean score)</li> <li>• Accessibility (mean score)</li> </ul> <p>Bicycle facilities</p> <ul style="list-style-type: none"> <li>• Quality (mean score)</li> <li>• Accessibility (mean score)</li> </ul> <p>Recreational areas</p> <ul style="list-style-type: none"> <li>• Quality (mean score)</li> <li>• Accessibility (mean score)</li> </ul>                                                                                                                                                                                                                      |
| Policy       | <p>Physical activity promotion programmes for medical students</p> <ul style="list-style-type: none"> <li>• Yes/No</li> <li>• Number</li> <li>• Programme names</li> </ul> <p>Education metrics</p> <ul style="list-style-type: none"> <li>• Basic knowledge of physical activity (Yes/No)</li> <li>• Physical activity and public health (Yes/No)</li> <li>• Physical activity counselling (Yes/No)</li> </ul> <p>Investment related to physical activity</p> <ul style="list-style-type: none"> <li>• Annual investment (Baht/year)</li> <li>• Per capita investment (Baht/student)</li> <li>• Per capita investment/annual tuition fee</li> </ul> |
| Surveillance | <p>First survey (year)</p> <p>Recent survey (year)</p>                                                                                                                                                                                                                                                                                                                                                                                                                                                                                                                                                                                               |

|  |                    |
|--|--------------------|
|  | Next survey (year) |
|--|--------------------|

## ETHICS AND DISSEMINATION

This study has been approved by the Human Research Ethics Committee Walailak University (protocol number: WUEC-16-005-01) and the study will conform to the Declaration of Helsinki. Participation in this study is entirely voluntary and medical students are free to refuse participation. This will not result in any penalty. Information about the research will be provided and the informed consent will be taken by asking the participants to indicate their agreement to participate by written informed-consent forms. The participants' information and responses will be strictly confidential and we will protect the participants' anonymity.

The MSPARC will be presented to the faculty committee via a staff meeting. We will provide the visualised report card at the main office of School of Medicine. Medical students will be informed via the faculty website and social media. The final report and results will be forwarded to the grant funder (Walailak University), key stakeholders and policymakers of the university. The findings and product (MSPARC) of the study will be disseminated to scholars and researchers through peer-reviewed journals as well as national and international conferences.

## DISCUSSION AND CONCLUSION

This study will present the PA situations of a medical school. The results will be presented via the MSPARC, which provides concise data. It may help to communicate scientific and public health data at a glance. Information on the prevalence of PA and sedentary behaviours will be the initial information for defining future goals to improve student health. The quality and accessibility of walkable neighbourhoods, bicycle facilities and recreational areas will

1  
2  
3 help the medical school to understand the underlying limitations of PA related environments.  
4  
5 This will lead to the in-depth exploration of a particular problem. According to the policy, the  
6  
7 data about PA promotion programmes will show the current activities and concerns about  
8  
9 medical students' health. Education metrics will reflect the comprehensiveness of the school  
10  
11 curriculum regarding knowledge and practice as well as the need for additional teaching. The  
12  
13 information on investment related to PA will indicate the adequacy of the budget for PA  
14  
15 promotion. Lastly, the surveillance information will deliver the year of first, recent and future  
16  
17 surveys in the medical school. These could be the milestones for evaluating and monitoring  
18  
19 PA situations in the medical school.  
20  
21  
22  
23  
24  
25

26  
27 A key limitation is that this cross-sectional study will be initially conducted in only one  
28  
29 medical school. However, this protocol and the MSPARC can be adopted for future surveys  
30  
31 or for other medical schools. For example, other medical schools can objectively measure PA  
32  
33 and sedentary behaviours using pedometers or accelerometers instead of using the GPAQ.  
34  
35 The MSPARC, based on the PA situations, will enable comparison and evaluation among  
36  
37 medical schools. At the larger scale, regional or national concerns can help develop a strategy  
38  
39 to strengthen collaboration among medical schools to promote PA in their own settings.  
40  
41  
42  
43  
44

#### 45 **Acknowledgements**

46  
47  
48 We thank Steve Melville for English language editing.  
49  
50  
51  
52  
53

#### 54 **Contributors**

55  
56  
57  
58  
59  
60



1  
2  
3 AW and ST initiated the idea for the project and developed the study design. SV, US and WA  
4 provided advice for the study design. PP was responsible for supervision of project. AW  
5 wrote early drafts of the manuscript. All the authors read and approved the final draft of the  
6 manuscript.  
7  
8  
9  
10

### 11 12 13 14 15 **Funding**

16  
17  
18 This work was supported by Walailak University grant number WUDPL60001.  
19  
20

### 21 22 23 24 **Competing interests**

25  
26  
27 None declared.  
28  
29  
30  
31

### 32 33 **REFERENCES**

- 34  
35 1. Sallis JF, Bull F, Guthold R, et al. Progress in physical activity over the Olympic  
36 quadrennium. *The Lancet* 2016;388(10051):1325-36.  
37  
38 2. Ding D, Lawson KD, Kolbe-Alexander TL, et al. The economic burden of physical  
39 inactivity: a global analysis of major non-communicable diseases. *The Lancet*  
40 2016;388(10051):1311-24.  
41  
42 3. Lee IM, Shiroma EJ, Lobelo F, et al. Effect of physical inactivity on major non-  
43 communicable diseases worldwide: an analysis of burden of disease and life expectancy. *The*  
44 *Lancet* 2012;380(9838):219-29.  
45  
46 4. World Health Organization. Physical activity: World Health Organization.  
47  
48  
49  
50  
51  
52  
53  
54  
55  
56  
57  
58  
59  
60  
<http://www.who.int/mediacentre/factsheets/fs385/en/> (accessed 25 Jan 2017).

- 1  
2  
3 5. World Health Organization. Global recommendations on physical activity for health.  
4  
5 Geneva, Switzerland: World Health Organization, 2010.  
6
- 7 6. Bauman AE, Reis RS, Sallis JF, et al. Correlates of physical activity: why are some  
8  
9 people physically active and others not? *The Lancet* 2012;380(9838):258-71.  
10
- 11 7. McLeroy KR, Bibeau D, Steckler A, Glanz K. An ecological perspective on health  
12  
13 promotion programs. *Health Educ Q* 1988;15(4):351-77.  
14
- 15 8. Reis RS, Salvo D, Ogilvie D, et al. Scaling up physical activity interventions  
16  
17 worldwide: stepping up to larger and smarter approaches to get people moving. *The Lancet*  
18  
19 2016;388(10051):1337-48.  
20
- 21 9. Global Observatory for Physical Activity. Physical activity country card: Thailand:  
22  
23 Global Observatory for Physical Activity.  
24  
25 <http://www.globalphysicalactivityobservatory.com/card/?country=TH> (accessed 25 Jan  
26  
27 2017).  
28
- 29 10. Thai Health Promotion Foundation, eds. Abstract book 1st National Conference on  
30  
31 Physical Activity; Bangkok, Thailand: Thai Health Promotion Foundation, 2015.  
32
- 33 11. International Society for Physical Activity and Health. The 6th ISPAH Congress:  
34  
35 International Society for Physical Activity and Health. <http://www.ispah.org/congress/>  
36  
37 (accessed 25 Jan 2017).  
38
- 39 12. Bangkok Post. Civil servants to exercise every Wednesday: Bangkok Post.  
40  
41 <http://m.bangkokpost.com/news/general/1141689/civil-servants-to-exercise-every-wednesday>  
42  
43 (accessed 25 Jan 2017).  
44
- 45 13. International Society for Physical Activity and Health. The Bangkok Declaration on  
46  
47 Physical Activity for Global Health and Sustainable development: International Society for  
48  
49 Physical Activity and Health. <http://www.ispah.org/resources> (accessed 25 Jan 2017).  
50  
51  
52  
53  
54  
55  
56  
57  
58  
59  
60

- 1  
2  
3 14. Stanford FC, Durkin MW, Stallworth JR, et al. Comparison of physical activity levels  
4  
5 in physicians and medical students with the general adult population of the United States.  
6  
7 Phys Sportsmed 2013;41(4):86-92.  
8
- 9  
10 15. Wattanapisit A, Gaensan T, Anothaisintawee T, eds. Prevalence of physical activity  
11  
12 and associated factors of medium and high activity among medical students at Ramathibodi  
13  
14 Hospital. The 6th International Conference on Sport and Exercise Science 2015.; Chonburi,  
15  
16 Thailand: Institute of Physical Education, 2015.  
17
- 18  
19 16. Wattanapisit A, Fungthongcharoen K, Saengow U, et al. Physical activity among  
20  
21 medical students in Southern Thailand: a mixed methods study. BMJ open  
22  
23 2016;6(9):e013479.  
24
- 25  
26 17. Lobelo F, Duperly J, Frank E. Physical activity habits of doctors and medical students  
27  
28 influence their counselling practices. Br J Sports Med 2009;43(2):89-92.  
29
- 30  
31 18. Stanford FC, Durkin MW, Stallworth JR, et al. Factors that influence physicians' and  
32  
33 medical students' confidence in counseling patients about physical activity. J Prim Prev  
34  
35 2014;35:193-201.  
36
- 37  
38 19. Stoutenberg M, Stasi S, Stamatakis E, et al. Physical activity training in US medical  
39  
40 schools: Preparing future physicians to engage in primary prevention. Phys Sportsmed  
41  
42 2015;43(4):388-94.  
43
- 44  
45 20. Weiler R, Chew S, Coombs N, et al. Physical activity education in the undergraduate  
46  
47 curricula of all UK medical schools: are tomorrow's doctors equipped to follow clinical  
48  
49 guidelines? Br J Sports Med 2012;46(14):1024-6.  
50
- 51  
52 21. Tremblay MS, Barnes JD, Cowie Bonne J. Impact of the Active Healthy Kids Canada  
53  
54 report card: a 10-year analysis. J Phys Act Health 2014;11(Suppl 1):S3-s20.  
55
- 56  
57 22. Global Observatory for Physical Activity. Project mission and methods: Global  
58  
59 Observatory for Physical Activity.  
60

1  
2  
3 <http://www.globalphysicalactivityobservatory.com/project-description/> (accessed 30 Jan  
4  
5 2017).

6  
7 23. Hallal P, Ramirez A. The Lancet Physical Activity Observatory : monitoring a 21st  
8  
9 century pandemic. *Res Exerc Epidemiol* 2015;17(1):1-5.

10  
11 24. Barnes JD, Cameron C, Carson V, et al. Results From Canada's 2016  
12  
13 ParticipACTION Report Card on Physical Activity for Children and Youth. *J Phys Act*  
14  
15 *Health* 2016;13(11 Suppl 2):S110-s6.

16  
17 25. Creswell JW. *Qualitative inquiry and research design : choosing among five*  
18  
19 *approaches*. 3 ed. Los Angeles, United States of America: SAGE, 2013.

20  
21 26. World Health Organization. *Global Physical Activity Questionnaire (GPAQ) Analysis*  
22  
23 *Guide*: World Health Organization.

24  
25 [http://www.who.int/chp/steps/resources/GPAQ\\_Analysis\\_Guide.pdf](http://www.who.int/chp/steps/resources/GPAQ_Analysis_Guide.pdf) (accessed 30 Jan 2017).

26  
27 27. Sallis JF, Frank LD, Saelens BE, et al. Active transportation and physical activity:  
28  
29 opportunities for collaboration on transportation and public health research. *Transp Res Part*  
30  
31 *A Policy Pract* 2004;38(4):249-68.

32  
33 28. Hurd AR, Anderson DM. *The park and recreation professional's handbook*. Illinois,  
34  
35 United States of America: Human Kinetics, 2011.

36  
37 29. Sundquist K, Eriksson U, Kawakami N, et al. Neighborhood walkability, physical  
38  
39 activity, and walking behavior: The Swedish Neighborhood and Physical Activity (SNAP)  
40  
41 study. *Soc Sci Med* 2011;72(8):1266-73.

42  
43 30. Wei Y, Xiao W, Wen M, et al. Walkability, Land Use and Physical Activity.  
44  
45 *Sustainability* 2016;8(1):65.

46  
47 31. White MP, Elliott LR, Taylor T, et al. Recreational physical activity in natural  
48  
49 environments and implications for health: A population based cross-sectional study in  
50  
51 England. *Prev Med* 2016;91:383-8.

1  
2  
3  
4  
5  
6  
7  
8  
9  
10  
11  
12  
13  
14  
15  
16  
17  
18  
19  
20  
21  
22  
23  
24  
25  
26  
27  
28  
29  
30  
31  
32  
33  
34  
35  
36  
37  
38  
39  
40  
41  
42  
43  
44  
45  
46  
47  
48  
49  
50  
51  
52  
53  
54  
55  
56  
57  
58  
59  
60

32. Medical Council of Thailand. Medical Competency Assessment Criteria for National License 2012. Bangkok, Thailand: Medical Council of Thailand, 2012.

For peer review only

# BMJ Open

## Development of a physical activity monitoring tool in a Thai medical school: a protocol for a mixed methods study to explore medical school physical activity situations

|                                 |                                                                                                                                                                                                                                                                                                                                                                                                                      |
|---------------------------------|----------------------------------------------------------------------------------------------------------------------------------------------------------------------------------------------------------------------------------------------------------------------------------------------------------------------------------------------------------------------------------------------------------------------|
| Journal:                        | <i>BMJ Open</i>                                                                                                                                                                                                                                                                                                                                                                                                      |
| Manuscript ID                   | bmjopen-2017-017297.R1                                                                                                                                                                                                                                                                                                                                                                                               |
| Article Type:                   | Protocol                                                                                                                                                                                                                                                                                                                                                                                                             |
| Date Submitted by the Author:   | 24-May-2017                                                                                                                                                                                                                                                                                                                                                                                                          |
| Complete List of Authors:       | Wattanapisit, Apichai; School of Medicine, Walailak University , Vijitpongjinda, Surasak ; School of Medicine, Walailak University Saengow, Udomsak; School of Medicine, Walailak University Amaek, Waluka ; School of Architecture and Design, Walailak University Thanamee, Sanhapan; Chiang Mai University, Family of Medicine, Faculty of Medicine Petchuay, Prachyapan ; Walailak University School of Medicine |
| <b>Primary Subject Heading</b>: | Medical education and training                                                                                                                                                                                                                                                                                                                                                                                       |
| Secondary Subject Heading:      | Health policy, Public health                                                                                                                                                                                                                                                                                                                                                                                         |
| Keywords:                       | Education metrics, Medical school, Medical students, Physical activity, Policy, Report card                                                                                                                                                                                                                                                                                                                          |
|                                 |                                                                                                                                                                                                                                                                                                                                                                                                                      |

SCHOLARONE™  
Manuscripts

Only

1  
2  
3 **Title:** Development of a physical activity monitoring tool in a Thai medical school: a  
4  
5 protocol for a mixed methods study to explore medical school physical activity situations  
6  
7  
8

9  
10 **Authors:**

11 Apichai Wattanapisit, MD<sup>1,2</sup>

12 Surasak Vijitpongjinda, MD<sup>1,2</sup>

13 Udomsak Saengow, MD, PhD<sup>1,2</sup>

14 Waluka Amaek, M.Arch. (Industrial Design)<sup>3</sup>

15 Sanhapan Thanamee, MD<sup>4</sup>

16 Prachyapan Petchuay, MD, PhD<sup>1</sup>

17  
18  
19  
20  
21  
22  
23  
24  
25  
26  
27 <sup>1</sup> School of Medicine, Walailak University, Thasala, Nakhon Si Thammarat, 80161, Thailand

28  
29 <sup>2</sup> Center of Excellence in Health System and Medical Research, Walailak University, Thasala,  
30  
31 Nakhon Si Thammarat, 80161, Thailand

32  
33 <sup>3</sup> School of Architecture and Design Walailak University, Thasala, Nakhon Si Thammarat,  
34  
35 80161, Thailand

36  
37 <sup>4</sup> Department of Family Medicine, Faculty of Medicine, Chiang Mai University, Chiang Mai,  
38  
39 50200, Thailand

40  
41  
42  
43 **Correspondence to** Apichai Wattanapisit; [apichai.wa@wu.ac.th](mailto:apichai.wa@wu.ac.th)

44  
45 **Contact number:** (+66)-8-6706-0440

46  
47 **Keywords:** Medical school; medical students; physical activity; policy; report card

48  
49 **Word count:** 2,212 (excluding title page, 286 words of abstract, 33 references, 1 box, 1 table  
50  
51 and 1 figure)  
52  
53  
54  
55  
56  
57  
58  
59  
60

## ABSTRACT

**Introduction:** Physical activity (PA) is important in promoting health as well as in the treatment and prevention of diseases. However, insufficient PA is still a global health problem and it is also a problem in medical schools. PA training in medical curricula is still sparse or non-existent. There is a need for a comprehensive understanding of PA situations in medical schools through several indicators, including people, place, and policy. This study is a protocol of a project that will include a survey of the PA situations in a medical school and development of a tool, the Medical School Physical Activity Report Card (MSPARC) which will contain concise and understandable infographics and information, for exploring, monitoring and reporting the information relating to PA situations.

**Methods and analysis:** This mixed methods study will run from January to September 2017. We will involve the School of Medicine, Walailak University, Thailand and its medical students (n=285). Data collection will consist of both primary and secondary data, divided into 4 parts: general information, people, place and policy. We will investigate the PA situations about (1) people: the prevalence of PA and sedentary behaviours; (2) place: the quality and accessibility of walkable neighbourhoods, bicycle facilities and recreational areas; and (3) policy: PA-promotion programmes for medical students, education metrics and investment related to PA. The MSPARC will be developed using simple symbols, infographics and short texts to represent the PA situations of the medical school.

**Ethics and dissemination:** This study has been approved by the Human Research Ethics Committee Walailak University (protocol number: WUEC-16-005-01). Findings will be published in peer-reviewed journals and presented at national or international conferences. The MSPARC and full report will be disseminated to relevant stakeholders, policymakers, staff and clients.



## STRENGTHS AND LIMITATIONS OF THIS STUDY

- This study includes comprehensive metrics about physical activity (PA) situations in a medical school.
- The Medical School Physical Activity Report Card (MSPARC) will be an innovative tool for exploring, monitoring and reporting the information related to PA situations.
- The MSPARC will provide concise and understandable infographics and information on PA situations of the medical school. Users can read the results at a glance.
- The study is limited by its cross-sectional design in only one medical school. However, the methodology can be adopted for subsequent surveys and for other medical schools. The data collection is adjustable for each medical school.

## INTRODUCTION

Physical inactivity is one of the global health challenges. The estimated prevalence of physical inactivity is 23.3% among adults, 76.3% in adolescents, 78.4% for boys and 84.4% for girls.[1] The pandemic of physical inactivity involves mortality, morbidity and economic costs.[2] Globally, physical inactivity causes about 1.6 million deaths a year, 15% of the burden of disease from colon and rectum cancer, 11% of ischaemic stroke, 9% of ischaemic heart disease and 7% of diabetes mellitus.[3] Economically, the estimated healthcare cost of physical inactivity was \$53.8 billion in 2013.[2] The World Health Organization (WHO) aims to reduce physical inactivity by 10% by 2025.[4] In response to this goal, the global recommendations on PA for health were launched in 2010.[5] Battling against physical inactivity or striving to increase PA requires understanding of multiple layers and associations among individual aspects, environmental aspects and public policies.[6, 7] It also needs a multi-sectoral, multidisciplinary and public-health response.[8]

In Thailand, about one-third (30%) of Thai adults are physically inactive, and 5.1% of mortality is due to physical inactivity.[9] It is a challenging task to reduce physical inactivity. In 2015 and 2016, the first national conference on physical activity and an international conference were held in the country. Their slogan was 'Active Living for All' and comprised an active people, active place and active policy.[10, 11] Consequently, PA campaigns have been widely promoted beyond individual involvement. A nationwide PA campaign was announced by the Prime Minister to instruct all government agencies to arrange exercise sessions every Wednesday from 15:00 to 16:30 pm.[12] Additionally, regular monitoring and reporting on progress of PA, its determinants and policy implementation are stated as a sustainable development goal.[13]

1  
2  
3 The national concern about promoting PA and reducing physical inactivity has emerged,  
4 especially in the healthcare system and medical schools. Nevertheless, physical inactivity is  
5 still a problem among medical students. A previous study showed that more than half  
6 (50.5%) of medical students in Southern Thailand are physically inactive.[14] The evidence  
7 supports a strong association between personal PA behaviours of medical students and PA  
8 counselling attitudes and practices.[15, 16] However, teaching and training about basic  
9 knowledge and skills to promote PA in medical schools is still sparse or non-existent.[17, 18]  
10 This issue is not only an individual concern; it is also a substantial issue in health promotion  
11 among medical schools and in medical student education. Nevertheless, there is a gap in the  
12 understanding of PA situations and its determinants in medical schools.  
13  
14  
15  
16  
17  
18  
19  
20  
21  
22  
23  
24  
25  
26

27 Comprehensive exploration and monitoring is an approach to increase PA in different  
28 populations. The Global Observatory for Physical Activity (GoPA) have launched PA report  
29 cards (country cards), a single slide infographic as a tool, presenting the information on  
30 country specific PA profiles for surveillance of PA prevalence and relevant situations.[19-21]  
31 The Report Card on Physical Activity for Children and Youth, PA surveillance among  
32 children, has been released annually since 2005 to assess PA situations.[22, 23] The previous  
33 evidence suggests PA report cards have been successful to get people moving.[23] This  
34 approach might be beneficial for medical schools. Therefore, a specific PA report card for  
35 medical school might be an effective tool for exploring, monitoring and reporting the  
36 situations of PA in a particular medical school.  
37  
38  
39  
40  
41  
42  
43  
44  
45  
46  
47  
48  
49  
50

51 We still do not have a study protocol to explore the PA situations in medical school, hence  
52 our research team will focus on exploring the PA situations, including prevalence of PA and  
53 sedentary behaviours; quality and accessibility of PA-related environments; and policies  
54  
55  
56  
57  
58  
59  
60

1  
2  
3 relating to PA, in a medical school and developing a tool for exploring, monitoring and  
4  
5 reporting the information relating to PA situations. This paper describes the study design and  
6  
7 the development of the Medical School Physical Activity Report Card (MSPARC).  
8  
9

## 10 11 **Aims and objectives**

12  
13  
14 The primary aims are:

- 15  
16 (1) To explore the PA situations of a medical school, including people, place and  
17  
18 policy.  
19
- 20  
21 (2) To develop the MSPARC for monitoring and reporting PA situations to clients  
22  
23 (medical students), staff, policymakers and stakeholders.  
24

25  
26  
27  
28 Secondary aim is to develop the MSPARC protocol for further surveillance and for other  
29  
30 medical schools.  
31

## 32 33 34 **METHODS AND ANALYSIS**

### 35 36 37 **Study design**

38  
39 A mixed methods study will be conducted. The study consists of both quantitative and  
40  
41 qualitative approaches. Quantitatively, a cross-sectional observational study will be  
42  
43 implemented to survey the relevant outcomes, including the prevalence of PA, the prevalence  
44  
45 of sedentary behaviours, and the quality and accessibility of active environments.  
46  
47 Qualitatively, a case study will focus on an in-depth description to develop a detailed analysis  
48  
49 of the medical school policies.[24] The study will occur in a 9-month period (from January to  
50  
51 September 2017).  
52  
53  
54

### 55 56 57 **Setting and participants**

1  
2  
3 The study will involve the medical students in three campuses of the School of Medicine,  
4  
5 Walialak University, Thailand (in Nakhon Si Thammarat main campus, Trang Hospital and  
6  
7 Vachira Phuket Hospital). All the preclinical years (years 1-3) study at the main campus. The  
8  
9 rest of the medical students (clinical years, years 4-6) receive clinical training and hospital  
10  
11 attachments at Trang Hospital and Vachira Phuket Hospital. The total number of medical  
12  
13 students is 285, with 46-48 students in each class.  
14  
15

### 16 17 18 **Data collection**

19  
20 Data collection will consist of both primary and secondary data, divided into 4 parts: general  
21  
22 information, people, place and policy.  
23  
24  
25

### 26 27 28 **General information**

29  
30 The information will include the land area of the medical school (only main campus), number  
31  
32 of students and annual tuition fee. All the information will be reviewed from the recent  
33  
34 university and/or faculty documents.  
35  
36  
37

### 38 39 **People**

40  
41 The secondary data on the participation of medical students in PA, using the Global Physical  
42  
43 Activity Questionnaire (GPAQ) including activities at work, travelling activities, and  
44  
45 recreational activities,[25] will be gathered from the previous survey in 2016.[14] PA in this  
46  
47 meaning is sufficient PA behaviours or the WHO recommended PA levels (any activities  
48  
49 which are equal to 150 minutes of moderate-intensity PA throughout the week or 75 minutes  
50  
51 of vigorous-intensity PA throughout the week, or combined (or an equivalent combination of)  
52  
53 moderate- and vigorous-intensity PA).[5] We will focus on the PA prevalence of the whole  
54  
55 population and the prevalence by sex and education level (preclinical and clinical levels).  
56  
57  
58  
59  
60

1  
2  
3  
4  
5 Sedentary time, collected by using the GPAQ, refers to time spent sitting during waking  
6  
7 hours.[25] We will define sedentary behaviour using the cut-off point of  $\geq 8$  hours per day of  
8  
9 sedentary time.[26, 27]  
10

### 11 12 13 14 **Place**

15  
16 We will assess the places related to active transportation and recreational PA in the main  
17  
18 campus. Active transportation refers to ‘walking and cycling for transportation’, ‘non-  
19  
20 motorised transport’ and ‘human powered transport’.[28] Recreational PA means a PA that  
21  
22 people engage in during their free time, that people enjoy, and that people recognise as  
23  
24 having socially redeeming values.[29] Both active transportation and recreational activities  
25  
26 are associated with natural and built environments.[28, 30-32]  
27  
28  
29  
30  
31

32 The data on PA-related places, including walkable neighbourhoods, bicycle facilities and  
33  
34 recreational environments, will be collected from the preclinical students (n=144) by using a  
35  
36 self-administered questionnaire developed by the research team. Box 1 shows the questions  
37  
38 to survey places for PA.  
39  
40  
41  
42

### 43 **Box 1** Questions to survey places for physical activity

44  
45 1. Usage: Do you use walkable neighbourhoods\*? (or bicycle facilities or recreational  
46  
47 areas)

48  
49  Yes (go to item 1.1)

No (go to item 1.2)

50  
51 1.1 How often do you use walkable neighbourhoods\*? (or bicycle facilities or  
52  
53 recreational areas)

54  
55  Sometimes (1-2 days/week)

Often (3-4 days/week)  
56  
57  
58  
59  
60

Always (5-7 days/week)

1.2 Why do you not use walkable neighbourhoods\*? (or bicycle facilities or recreational areas)

Not interested/dissatisfied

Unsafe

Unavailable/inconvenient

Other reason (please specify)

2. Quality: How much do you rate the quality of walkable neighbourhoods\*? (or bicycle facilities or recreational areas)

An 11-point scale, with end-points at 0 (least) and 10 (most) will be provided.

3. Accessibility: How much do you rate the accessibility of walkable neighbourhoods\*? (or bicycle facilities or recreational areas)

An 11-point scale, with end-points at 0 (least) and 10 (most) will be provided.

\* Walkable neighbourhoods or bicycle facilities or recreational areas

## Policy

We will collect the data on PA-promotion programmes for medical students from the School of Medicine annual plans and reports. The data will include the number and name of programmes or projects related to PA promotion for medical students. The investment related to PA (amount of expense) will be collected.

As part of the Thai national medical competency issued by the Medical Council of Thailand, medical students have to learn about approaches to health promotion including exercise.[33] The criteria does not specify particular aspects about PA education and training. The school curriculum will be reviewed to explore the education metrics regarding the following topics:

1  
2  
3 (1) basic knowledge of PA – basic science of PA; (2) PA and public health – PA guidelines  
4 and PA promotion in public health; and (3) PA counselling – tailored PA counselling for  
5 healthy people and patients.  
6  
7  
8  
9

## 10 11 **Data analysis**

### 12 13 **People**

14  
15 We will reanalyse the data from the previous survey.[14] The prevalence of PA will be  
16 calculated by dividing the number of participants who met the recommended PA levels with  
17 the total number of participants. For each sex, the prevalence will be calculated by dividing  
18 the number of a particular sex who met the recommended PA levels with the total number of  
19 the same sex. The prevalence of PA for preclinical and clinical students will be classified.  
20  
21  
22  
23  
24  
25  
26  
27  
28  
29

30 The prevalence of sedentary behaviours will be calculated by dividing the number of  
31 participants who engage in  $\geq 8$  hours/day of sedentary time with the total number of  
32 participants, the prevalence of sedentary behaviours for each sex, and the prevalence of  
33 sedentary behaviours for preclinical and clinical students will be analysed.  
34  
35  
36  
37  
38  
39

### 40 41 **Place**

42  
43 We will use descriptive statistics, including frequencies and percentages, describing the usage  
44 of walkable neighbourhoods, bicycle facilities and recreational areas. The quality and  
45 accessibility of walkable neighbourhoods, bicycle facilities and recreational areas will be  
46 calculated from the self-rating scales as mean scores to generate the fundamental and  
47 comparable data among each place.  
48  
49  
50  
51  
52  
53  
54

### 55 56 57 **Policy**



Two investigators will independently review the relevant documents to find PA-promotion programmes for medical students. Two investigators will analyse the education metrics from the school curriculum to discover the lectures, active learning sessions or clinical teaching topics about basic knowledge of PA, PA and public health, and PA counselling. Any differences in the analyses will be resolved through consensus. The analysis will confirmed by the research team members.

For the investment related to PA, we will calculate (1) the annual investment in PA programmes, (2) per capita investment (dividing the annual investment with the total number of medical students) and (3) ratio of per capita investment to annual tuition fee (dividing the per capita investment by the annual tuition fee).

### Development of the Medical School Physical Activity Report Card

The indicators of the MSPARC will consist of 5 parts: general information, people, place, policy and surveillance (Table 1). We will design simple and concise report cards (Figure 1) in Thai and English versions using uncomplicated symbols, infographics and short texts.

**Table 1** Data indicators of the Medical School Physical Activity Report Card

|                     |                                                                                                                   |
|---------------------|-------------------------------------------------------------------------------------------------------------------|
| General information | Land area (km <sup>2</sup> )<br><br>Number of students (people)<br><br>Tuition fee (Baht/academic year)           |
| People              | Prevalence of physical activity <ul style="list-style-type: none"> <li>• Total (%)</li> <li>• Male (%)</li> </ul> |

|        |                                                                                                                                                                                                                                                                                                                                                                                                                                                                                                                                                  |
|--------|--------------------------------------------------------------------------------------------------------------------------------------------------------------------------------------------------------------------------------------------------------------------------------------------------------------------------------------------------------------------------------------------------------------------------------------------------------------------------------------------------------------------------------------------------|
|        | <ul style="list-style-type: none"> <li>• Female (%)</li> </ul> <p>Prevalence of sedentary behaviours</p> <ul style="list-style-type: none"> <li>• Total (%)</li> <li>• Male (%)</li> <li>• Female (%)</li> </ul>                                                                                                                                                                                                                                                                                                                                 |
| Place  | <p>Walkable neighbourhoods</p> <ul style="list-style-type: none"> <li>• Quality (mean score)</li> <li>• Accessibility (mean score)</li> </ul> <p>Bicycle facilities</p> <ul style="list-style-type: none"> <li>• Quality (mean score)</li> <li>• Accessibility (mean score)</li> </ul> <p>Recreational areas</p> <ul style="list-style-type: none"> <li>• Quality (mean score)</li> <li>• Accessibility (mean score)</li> </ul>                                                                                                                  |
| Policy | <p>Physical activity promotion programmes for medical students</p> <ul style="list-style-type: none"> <li>• Yes/No</li> <li>• Number</li> <li>• Programme names</li> </ul> <p>Education metrics</p> <ul style="list-style-type: none"> <li>• Basic knowledge of physical activity (Yes/No)</li> <li>• Physical activity and public health (Yes/No)</li> <li>• Physical activity counselling (Yes/No)</li> </ul> <p>Investment related to physical activity</p> <ul style="list-style-type: none"> <li>• Annual investment (Baht/year)</li> </ul> |

|              |                                                                                                                                              |
|--------------|----------------------------------------------------------------------------------------------------------------------------------------------|
|              | <ul style="list-style-type: none"> <li>• Per capita investment (Baht/student)</li> <li>• Per capita investment/annual tuition fee</li> </ul> |
| Surveillance | <p>First survey (year)</p> <p>Recent survey (year)</p> <p>Next survey (year)</p>                                                             |

## ETHICS AND DISSEMINATION

This study has been approved by the Human Research Ethics Committee Walailak University (protocol number: WUEC-16-005-01) and the study will conform to the Declaration of Helsinki. Participation in this study is entirely voluntary and medical students are free to refuse participation. This will not result in any penalty. Information about the research will be provided and the informed consent will be taken by asking the participants to indicate their agreement to participate by written informed-consent forms. The participants' information and responses will be strictly confidential and we will protect the participants' anonymity.

The MSPARC will be presented to the faculty committee via a staff meeting. We will provide the visualised report card at the main office of School of Medicine. Medical students will be informed via the faculty website and social media. The final report and results will be forwarded to the grant funder (Walailak University), key stakeholders and policymakers of the university. The findings and tool (MSPARC) of the study will be disseminated to scholars and researchers through peer-reviewed journals as well as national and international conferences.

## DISCUSSION

1  
2  
3 This study will analyse the PA situations of a medical school. The results will be presented  
4  
5 via the MSPARC, which provides concise data. It may help to communicate scientific and  
6  
7 public health data at a glance. Information on the prevalence of PA and sedentary behaviours  
8  
9 will be the initial information for defining future goals to improve student health. The quality  
10  
11 and accessibility of walkable neighbourhoods, bicycle facilities and recreational areas will  
12  
13 help the medical school to understand the underlying limitations of PA-related environments.  
14  
15 This will lead to the in-depth exploration of a particular problem. According to the policy, the  
16  
17 data about PA-promotion programmes will show the current activities and concerns about  
18  
19 medical students' health. Education metrics will reflect the comprehensiveness of the school  
20  
21 curriculum regarding knowledge and practice as well as the need for additional teaching. The  
22  
23 information on investment related to PA will indicate the adequacy of the budget for PA  
24  
25 promotion. Lastly, the surveillance information will deliver the year of first, recent and future  
26  
27 surveys in the medical school. These could be the milestones for evaluating and monitoring  
28  
29 PA situations in the medical school.  
30  
31  
32  
33  
34  
35  
36

37  
38 A key limitation is that this cross-sectional study will be initially conducted in only one  
39  
40 medical school. However, this protocol and the MSPARC can be adopted for future surveys  
41  
42 or for other medical schools. For example, other medical schools can objectively measure PA  
43  
44 and sedentary behaviours using pedometers or accelerometers instead of using the GPAQ.  
45  
46 The MSPARC, based on the PA situations, will enable comparison and evaluation among  
47  
48 medical schools. Nevertheless, there is a need to evaluate the effectiveness and feasibility of  
49  
50 the MSPARC. An implementation study will be necessary prior to future surveys. At the  
51  
52 larger scale, regional or national concerns can help develop a strategy to strengthen  
53  
54 collaboration among medical schools to promote PA in their own settings.  
55  
56  
57  
58  
59  
60

## Acknowledgements

We thank Steve Melville for English language editing.

## Contributors

AW and ST initiated the idea for the project and developed the study design. SV, US and WA provided advice for the study design. PP was responsible for supervision of project. AW wrote early drafts of the manuscript. All the authors read and approved the final draft of the manuscript.

## Funding

This work was supported by Walailak University grant number WUDPL60001.

## Competing interests

None declared.

## Data sharing statement

No additional data are available.

## Figure legends

1  
2  
3 Figure 1 Example of the Medical School Physical Activity Report Card (MSPARC).  
4  
5  
6  
7

## 8 REFERENCES

- 9
- 10 1. Sallis JF, Bull F, Guthold R, et al. Progress in physical activity over the Olympic  
11 quadrennium. *The Lancet* 2016;388(10051):1325-36.  
12
  - 13 2. Ding D, Lawson KD, Kolbe-Alexander TL, et al. The economic burden of physical  
14 inactivity: a global analysis of major non-communicable diseases. *The Lancet*  
15 2016;388(10051):1311-24.  
16
  - 17 3. GBD 2015 Risk Factors Collaborators. Global, regional, and national comparative  
18 risk assessment of 79 behavioural, environmental and occupational, and metabolic risks or  
19 clusters of risks, 1990-2015: a systematic analysis for the Global Burden of Disease Study  
20 2015. *The Lancet* 2016;388(10053):1659-724.  
21
  - 22 4. World Health Organization. Physical activity: World Health Organization.  
23 <http://www.who.int/mediacentre/factsheets/fs385/en/> (accessed 25 Jan 2017).  
24
  - 25 5. World Health Organization. Global recommendations on physical activity for health.  
26 Geneva, Switzerland: World Health Organization, 2010.  
27
  - 28 6. Bauman AE, Reis RS, Sallis JF, et al. Correlates of physical activity: why are some  
29 people physically active and others not? *The Lancet* 2012;380(9838):258-71.  
30
  - 31 7. McLeroy KR, Bibeau D, Steckler A, Glanz K. An ecological perspective on health  
32 promotion programs. *Health Educ Q* 1988;15(4):351-77.  
33
  - 34 8. Reis RS, Salvo D, Ogilvie D, et al. Scaling up physical activity interventions  
35 worldwide: stepping up to larger and smarter approaches to get people moving. *The Lancet*  
36 2016;388(10051):1337-48.  
37
  - 38 9. Global Observatory for Physical Activity. Physical activity country card: Thailand:  
39 Global Observatory for Physical Activity.  
40  
41  
42  
43  
44  
45  
46  
47  
48  
49  
50  
51  
52  
53  
54  
55  
56  
57  
58  
59  
60

- 1  
2  
3 <http://www.globalphysicalactivityobservatory.com/card/?country=TH> (accessed 25 Jan  
4  
5 2017).  
6  
7  
8 10. Thai Health Promotion Foundation, eds. Abstract book 1st National Conference on  
9  
10 Physical Activity; Bangkok, Thailand: Thai Health Promotion Foundation, 2015.  
11  
12 11. International Society for Physical Activity and Health. The 6th ISPAH Congress:  
13  
14 International Society for Physical Activity and Health. <http://www.ispah.org/congress/>  
15  
16 (accessed 25 Jan 2017).  
17  
18 12. Bangkok Post. Civil servants to exercise every Wednesday: Bangkok Post.  
19  
20 <http://m.bangkokpost.com/news/general/1141689/civil-servants-to-exercise-every-wednesday>  
21  
22 (accessed 25 Jan 2017).  
23  
24 13. International Society for Physical Activity and Health. The Bangkok Declaration on  
25  
26 Physical Activity for Global Health and Sustainable development: International Society for  
27  
28 Physical Activity and Health. <http://www.ispah.org/resources> (accessed 25 Jan 2017).  
29  
30  
31 14. Wattanapisit A, Funghongcharoen K, Saengow U, et al. Physical activity among  
32  
33 medical students in Southern Thailand: a mixed methods study. *BMJ open*  
34  
35 2016;6(9):e013479.  
36  
37 15. Lobelo F, Duperly J, Frank E. Physical activity habits of doctors and medical students  
38  
39 influence their counselling practices. *Br J Sports Med* 2009;43(2):89-92.  
40  
41  
42 16. Stanford FC, Durkin MW, Stallworth JR, et al. Factors that influence physicians' and  
43  
44 medical students' confidence in counseling patients about physical activity. *J Prim Prev*  
45  
46 2014;35:193–201.  
47  
48  
49 17. Stoutenberg M, Stasi S, Stamatakis E, et al. Physical activity training in US medical  
50  
51 schools: Preparing future physicians to engage in primary prevention. *Phys Sportsmed*  
52  
53 2015;43(4):388-94.  
54  
55  
56  
57  
58  
59  
60

- 1  
2  
3 18. Weiler R, Chew S, Coombs N, et al. Physical activity education in the undergraduate  
4  
5 curricula of all UK medical schools: are tomorrow's doctors equipped to follow clinical  
6  
7 guidelines? *Br J Sports Med* 2012;46(14):1024-6.  
8  
9  
10 19. Global Observatory for Physical Activity. Project mission and methods: Global  
11  
12 Observatory for Physical Activity.  
13  
14 <http://www.globalphysicalactivityobservatory.com/project-description/> (accessed 30 Jan  
15  
16 2017).  
17  
18 20. Hallal P, Ramirez A. The Lancet Physical Activity Observatory : monitoring a 21st  
19  
20 century pandemic. *Res Exerc Epidemiol* 2015;17(1):1-5.  
21  
22  
23 21. Tremblay MS, Gonzalez SA, Katzmarzyk PT, et al. Physical activity report cards:  
24  
25 Active Healthy Kids Global Alliance and The Lancet Physical Activity Observatory. *J Phys*  
26  
27 *Act Health* 2015;12(3):297-8.  
28  
29  
30 22. Barnes JD, Cameron C, Carson V, et al. Results From Canada's 2016  
31  
32 ParticipACTION Report Card on Physical Activity for Children and Youth. *J Phys Act*  
33  
34 *Health* 2016;13(11 Suppl 2):S110-s6.  
35  
36  
37 23. Tremblay MS, Barnes JD, Cowie Bonne J. Impact of the Active Healthy Kids Canada  
38  
39 report card: a 10-year analysis. *J Phys Act Health* 2014;11(Suppl 1):S3-s20.  
40  
41  
42 24. Creswell JW. Qualitative inquiry and research design : choosing among five  
43  
44 approaches. 3 ed. Los Angeles, United States of America: SAGE, 2013.  
45  
46 [http://www.who.int/chp/steps/resources/GPAQ\\_Analysis\\_Guide.pdf](http://www.who.int/chp/steps/resources/GPAQ_Analysis_Guide.pdf) (accessed 30 Jan 2017).  
47  
48 25. World Health Organization. Global Physical Activity Questionnaire (GPAQ) Analysis  
49  
50 Guide: World Health Organization.  
51  
52 26. van der Ploeg HP, Chey T, Korda RJ, et al. Sitting time and all-cause mortality risk in  
53  
54 222 497 Australian adults. *Arch Intern Med* 2012;172(6):494-500.  
55  
56  
57  
58  
59  
60



- 1  
2  
3 27. Win AM, Yen LW, Tan KH, et al. Patterns of physical activity and sedentary  
4 behavior in a representative sample of a multi-ethnic South-East Asian population: a cross-  
5 sectional study. BMC public health 2015;15:318.  
6  
7  
8  
9  
10 28. Sallis JF, Frank LD, Saelens BE, et al. Active transportation and physical activity:  
11 opportunities for collaboration on transportation and public health research. Transp Res Part  
12 A Policy Pract 2004;38(4):249-68.  
13  
14  
15  
16 29. Hurd AR, Anderson DM. The park and recreation professional's handbook. Illinois,  
17 United States of America: Human Kinetics, 2011.  
18  
19  
20  
21 30. Sundquist K, Eriksson U, Kawakami N, et al. Neighborhood walkability, physical  
22 activity, and walking behavior: The Swedish Neighborhood and Physical Activity (SNAP)  
23 study. Soc Sci Med 2011;72(8):1266-73.  
24  
25  
26  
27 31. Wei Y, Xiao W, Wen M, et al. Walkability, Land Use and Physical Activity.  
28 Sustainability 2016;8(1):65.  
29  
30  
31  
32 32. White MP, Elliott LR, Taylor T, et al. Recreational physical activity in natural  
33 environments and implications for health: A population based cross-sectional study in  
34 England. Prev Med 2016;91:383-8.  
35  
36  
37  
38 33. Medical Council of Thailand. Medical Competency Assessment Criteria for National  
39 License 2012. Bangkok, Thailand: Medical Council of Thailand, 2012.  
40  
41  
42  
43  
44  
45  
46  
47  
48  
49  
50  
51  
52  
53  
54  
55  
56  
57  
58  
59  
60

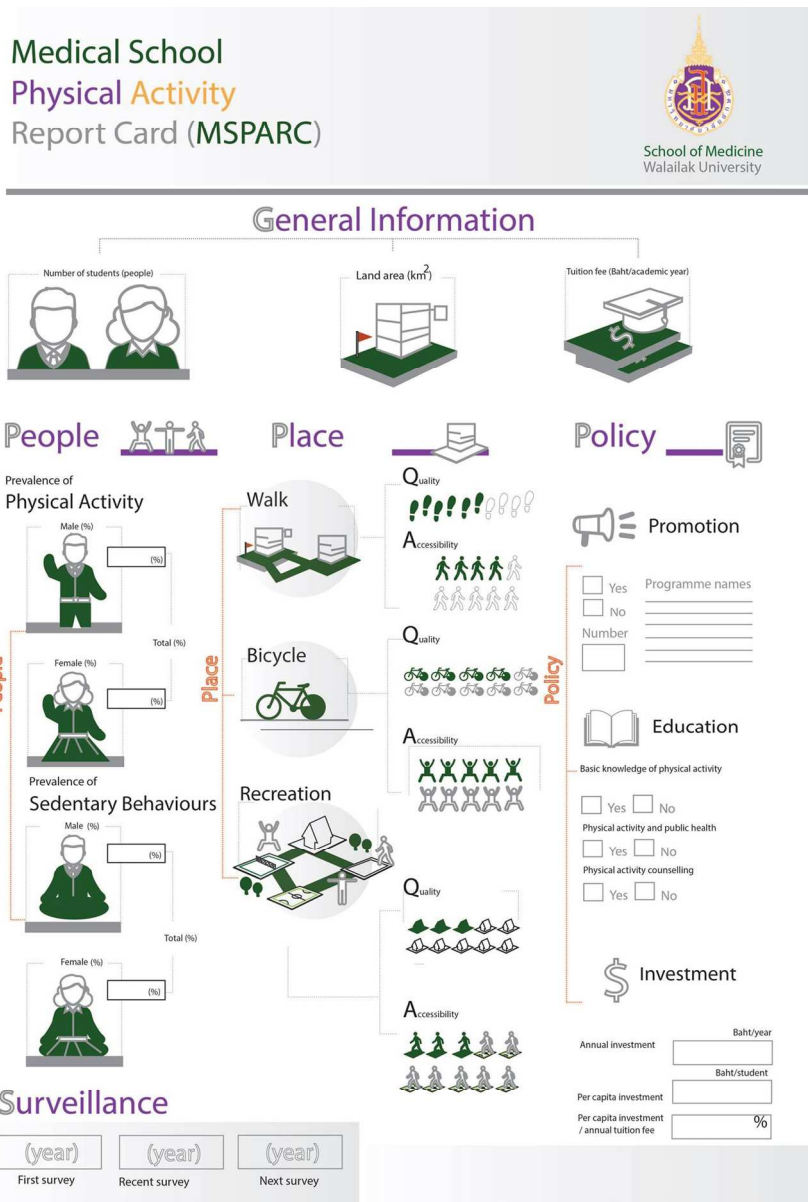

Figure 1 Example of the Medical School Physical Activity Report Card (MSPARC).

122x173mm (300 x 300 DPI)

# BMJ Open

## Development of a physical activity monitoring tool for Thai medical schools: a protocol for a mixed methods study

|                                 |                                                                                                                                                                                                                                                                                                                                                                                                                      |
|---------------------------------|----------------------------------------------------------------------------------------------------------------------------------------------------------------------------------------------------------------------------------------------------------------------------------------------------------------------------------------------------------------------------------------------------------------------|
| Journal:                        | <i>BMJ Open</i>                                                                                                                                                                                                                                                                                                                                                                                                      |
| Manuscript ID                   | bmjopen-2017-017297.R2                                                                                                                                                                                                                                                                                                                                                                                               |
| Article Type:                   | Protocol                                                                                                                                                                                                                                                                                                                                                                                                             |
| Date Submitted by the Author:   | 06-Jul-2017                                                                                                                                                                                                                                                                                                                                                                                                          |
| Complete List of Authors:       | Wattanapisit, Apichai; School of Medicine, Walailak University , Vjijtpongjinda, Surasak ; School of Medicine, Walailak University Saengow, Udomsak; School of Medicine, Walailak University Amaek, Waluka ; School of Architecture and Design, Walailak University Thanamee, Sanhapan; Chiang Mai University, Family of Medicine, Faculty of Medicine Petchuay, Prachyapan ; Walailak University School of Medicine |
| <b>Primary Subject Heading</b>: | Medical education and training                                                                                                                                                                                                                                                                                                                                                                                       |
| Secondary Subject Heading:      | Health policy, Public health                                                                                                                                                                                                                                                                                                                                                                                         |
| Keywords:                       | Education metrics, Medical school, Medical students, Physical activity, Policy, Report card                                                                                                                                                                                                                                                                                                                          |
|                                 |                                                                                                                                                                                                                                                                                                                                                                                                                      |

SCHOLARONE™  
Manuscripts

1  
2  
3 Development of a physical activity monitoring tool for Thai medical schools: a protocol for a  
4  
5 mixed methods study  
6  
7  
8

9  
10 **Authors:**

11 Apichai Wattanapisit, MD<sup>1,2</sup>

12 Surasak Vijitpongjinda, MD<sup>1,2</sup>

13 Udomsak Saengow, MD, PhD<sup>1,2</sup>

14 Waluka Amaek, M. Arch. (Industrial Design)<sup>3</sup>

15 Sanhapan Thanamee, MD<sup>4</sup>

16 Prachyapan Petchuay, MD, PhD<sup>1</sup>

17  
18  
19  
20  
21  
22  
23  
24  
25  
26  
27  
28 <sup>1</sup> School of Medicine, Walailak University, Thasala, Nakhon Si Thammarat, 80161, Thailand

29  
30  
31  
32 <sup>2</sup> Center of Excellence in Health System and Medical Research, Walailak University, Thasala,  
33 Nakhon Si Thammarat, 80161, Thailand

34  
35  
36  
37 <sup>3</sup> School of Architecture and Design, Walailak University, Thasala, Nakhon Si Thammarat,  
38 80161, Thailand

39  
40  
41  
42 <sup>4</sup> Department of Family Medicine, Faculty of Medicine, Chiang Mai University, Chiang Mai,  
43 50200, Thailand

44 **Correspondence to** Apichai Wattanapisit; [apichai.wa@wu.ac.th](mailto:apichai.wa@wu.ac.th)

45 **Contact number:** (+66)-8-6706-0440

46  
47 **Keywords:** Medical school; medical students; physical activity; policy; report card

48  
49  
50 **Word count:** 2,239 (excluding title page, 280 words of abstract, 33 references, 1 box, 1 table  
51 and 1 figure)  
52  
53  
54  
55

56  
57 **ABSTRACT**  
58  
59  
60

1  
2  
3 **Introduction:** Physical activity (PA) is important in promoting health as well as in the  
4  
5 treatment and prevention of diseases. However, insufficient PA is still a global health  
6  
7 problem and it is also a problem in medical schools. PA training in medical curricula is still  
8  
9 sparse or non-existent. There is a need for a comprehensive understanding of the extent of PA  
10  
11 in medical schools through several indicators, including people, places, and policies. This  
12  
13 study includes a survey of the PA prevalence in a medical school and development of a tool,  
14  
15 the Medical School Physical Activity Report Card (MSPARC) that will contain concise and  
16  
17 understandable infographics and information, for exploring, monitoring, and reporting  
18  
19 information relating to PA prevalence.  
20  
21

22  
23 **Methods and analysis:** This mixed methods study will run from January to September 2017.  
24  
25 We will involve the School of Medicine, Walailak University, Thailand and its medical  
26  
27 students (n=285). Data collection will consist of both primary and secondary data, divided  
28  
29 into four parts: general information, people, places, and policies. We will investigate the PA  
30  
31 metrics about (1) people: the prevalence of PA and sedentary behaviours; (2) place: the  
32  
33 quality and accessibility of walkable neighbourhoods, bicycle facilities, and recreational  
34  
35 areas; and (3) policy: PA-promotion programmes for medical students, education metrics,  
36  
37 and investments related to PA. The MSPARC will be developed using simple symbols,  
38  
39 infographics, and short texts to evaluate the PA metrics of the medical school.  
40  
41  
42  
43

44 **Ethics and dissemination:** This study has been approved by the Human Research Ethics  
45  
46 Committee of Walailak University (protocol number: WUEC-16-005-01). Findings will be  
47  
48 published in peer-reviewed journals and presented at national or international conferences.  
49  
50 The MSPARC and full report will be disseminated to relevant stakeholders, policymakers,  
51  
52 staff, and clients.  
53  
54  
55  
56  
57  
58  
59  
60

## STRENGTHS AND LIMITATIONS OF THIS STUDY

- The mixed methods design of the study will include comprehensive metrics about physical activity (PA) in a medical school.
- The data analysed from this study will be presented as an innovative tool, the Medical School Physical Activity Report Card (MSPARC), for exploring, monitoring, and reporting on PA prevalence.
- The MSPARC will provide concise and understandable infographics and information on PA at the medical school. Users can read the results at a glance.
- The study is limited by its cross-sectional design presenting data from only one medical school. However, the methodology can be adopted for subsequent surveys and for other medical schools. The data collection can be adjusted for the conditions present at each medical school.

## INTRODUCTION

Physical inactivity is a global health challenge. The estimated prevalence of physical inactivity is 23.3% among adults, 76.3% in adolescents, 78.4% for boys, and 84.4% for girls.<sup>1</sup> The pandemic of physical inactivity leads to increased mortality and morbidity as well as increased economic costs.<sup>2</sup> Globally, physical inactivity leads to about 1.6 million deaths a year, 15% of the burden of disease from colorectal cancer, 11% of ischaemic stroke, 9% of ischaemic heart disease, and 7% of diabetes mellitus.<sup>3</sup> The economic cost of physical inactivity was estimated to be \$53.8 billion in 2013.<sup>2</sup> The World Health Organization (WHO) set a goal of reducing physical inactivity by 10% by 2025.<sup>4</sup> In response to this, global recommendations on physical activity (PA) for health were launched in 2010.<sup>5</sup> Reducing physical inactivity or increasing PA requires understanding of multiple factors including individual characteristics, environmental resources, and public policies.<sup>6,7</sup> It also entails a multi-sector, multidisciplinary public health response.<sup>8</sup>

In Thailand, about 30% of adults are physically inactive, and this leads to about 5.1% of the mortality nationally.<sup>9</sup> Reducing the high rates of physical inactivity in the adult population will be a challenging task. In 2015 and 2016, the first national conference on health and physical activity, as well as an international conference, were held in Thailand. The slogan at the national conference was “Active Living for All” and was adopted to encourage active people, places, and policies.<sup>10,11</sup> Subsequently, PA campaigns have been widely promoted. A nationwide PA campaign was announced by the Prime Minister, and all government agencies were to arrange exercise sessions every Wednesday afternoon from 15:00 to 16:30.<sup>12</sup> Regular monitoring and reporting on the progress being made to increase PA were instituted as a sustainable development goal.<sup>13</sup>

1  
2  
3 Thus, a national policy for promoting PA and reducing physical inactivity emerged from  
4 these efforts, with a focus on the healthcare system and medical schools. Nevertheless,  
5 physical inactivity still occurs commonly among medical students, with about half (50.5%) of  
6 them in Southern Thailand not being physically active.<sup>14</sup> This is problematic because the  
7 evidence shows a strong association between the personal PA behaviours of medical students  
8 and their PA counselling attitudes and practices.<sup>15,16</sup> However, the education provided in  
9 medical schools to promote PA is either sparse or non-existent.<sup>17,18</sup> This issue is an individual  
10 concern as well as a substantial issue for provision of an appropriate medical curriculum,  
11 given the ongoing gap in the understanding of the role of PA in health maintenance and its  
12 determinants in medical schools.  
13  
14  
15  
16  
17  
18  
19  
20  
21  
22  
23  
24  
25  
26

27 The approaches that have been utilized to increase PA in different populations include  
28 comprehensive exploration and monitoring. The Global Observatory for Physical Activity  
29 (GoPA) launched PA report cards (“country cards”) as a single slide infographic tool for  
30 presenting the information on country specific PA profiles for surveillance of PA prevalence  
31 and relevant metrics.<sup>19-21</sup> The Report Card on Physical Activity for Children and Youth, PA  
32 surveillance among children, has been released annually since 2005 to assess PA.<sup>22,23</sup> The  
33 evidence suggests that PA report cards can “get people moving.”<sup>23</sup> This approach might be  
34 beneficial for medical schools. Therefore, a specific PA report card designed for medical  
35 students might be an effective tool for exploring, monitoring, and reporting the prevalence of  
36 PA in a particular cohort at one or more medical schools.  
37  
38  
39  
40  
41  
42  
43  
44  
45  
46  
47  
48  
49  
50  
51

52 We still do not have a study protocol to explore the PA prevalence in medical schools.  
53 Therefore, our research team will focus on exploring relevant metrics for PA, including (1)  
54 the extent of PA and sedentary behaviours, (2) the quality and accessibility of PA-related  
55  
56  
57  
58  
59  
60



1  
2  
3 environments, (3) any policies relating to PA in medical schools, and (4) developing a tool  
4  
5 for exploring, monitoring, and reporting the information relating to PA prevalence. This  
6  
7 paper describes the study design and the development of the Medical School Physical  
8  
9 Activity Report Card (MSPARC).  
10

## 11 12 13 14 **Aims and objectives**

15  
16 Primary aims:

- 17  
18 (1) Explore the PA metrics of a medical school, including people, places and  
19  
20 policies.  
21  
22 (2) Develop the MSPARC for monitoring and reporting PA prevalence to clients  
23  
24 (medical students), staff, policymakers, and stakeholders.  
25  
26  
27

28  
29  
30 Secondary aims are to develop the MSPARC protocol for further surveillance and for  
31  
32 additional medical school settings.  
33  
34  
35

## 36 37 **METHODS AND ANALYSIS**

### 38 39 **Study design**

40  
41 A mixed methods study will be conducted, and will consist of both quantitative and  
42  
43 qualitative approaches. Quantitatively, a cross-sectional observational study will be  
44  
45 implemented to survey the relevant outcomes, including the prevalence of PA, the prevalence  
46  
47 of sedentary behaviours, and the quality and accessibility of active environments.  
48  
49

50  
51 Qualitatively, a case study will focus on an in-depth description to develop a detailed analysis  
52  
53 of the medical school policies.<sup>24</sup> The study will be carried out over a 9-month period (from  
54  
55 January to September 2017).  
56  
57  
58  
59  
60

## Setting and participants

The study will involve the medical students at three campuses of the School of Medicine, Walialak University, Thailand (in Nakhon Si Thammarat main campus, Trang Hospital, and Vachira Phuket Hospital). All students are enrolled in preclinical years (years 1 to 3) study at the main campus. The rest of the medical students (clinical years, years 4 to 6) receive clinical training and hospital attachments at Trang Hospital and Vachira Phuket Hospital. The total number of medical students is 285, with 46 to 48 students in each class.

## Data collection

Data collection will consist of both primary and secondary data, divided into 4 parts: general information, people, places, and policies.

## General information

The information will include the land area of the medical school (for the main campus), number of students, and annual tuition fees. All this information will be collected from recent university and/or faculty documents.

## People

The secondary data on the participation of medical students in PA, using the Global Physical Activity Questionnaire (GPAQ) – including activity that occurs during work, travel, and recreation<sup>25</sup> – will be derived from the previous survey in 2016.<sup>14</sup> PA in this context is sufficient behaviours or the WHO recommended levels, which includes any activity that equals (1) 150 minutes of moderate-intensity exercise throughout the week, (2) 75 minutes of vigorous-intensity exercise throughout the week, or (3) an equivalent combination of moderate- and vigorous-intensity PA.<sup>5</sup> We will focus on the PA prevalence of the entire

1  
2  
3 student population and the prevalence by sex and seniority level (preclinical and clinical  
4  
5 levels).

6  
7  
8  
9  
10 Sedentary time, collected by using the GPAQ, refers to time spent sitting during waking  
11  
12 hours.<sup>25</sup> We define sedentary behaviour using the cut-off of  $\geq 8$  hours per day of sedentary  
13  
14 time.<sup>26,27</sup>

### 18 **Place**

20 We will assess the places related to active transportation and recreational PA in the main  
21  
22 campus. Active transportation refers to “walking and cycling for transportation,” “non-  
23  
24 motorised transport,” and “human powered transport.”<sup>28</sup> Recreational PA means a PA that  
25  
26 people engage in during their free time, that people enjoy, and that people recognise as  
27  
28 having socially redeeming value.<sup>29</sup> Both active transportation and recreational activities are  
29  
30 associated with natural and built environments.<sup>28,30-32</sup>

31  
32  
33  
34  
35  
36 The data on PA-related places, including walkable neighbourhoods, bicycle facilities, and  
37  
38 recreational environments, will be collected from the preclinical students (n = 144) by using a  
39  
40 self-administered questionnaire developed by the research team. Box 1 shows the questions  
41  
42 to survey places for PA.

#### 47 **Box 1** Questions to survey places for physical activity

49  
50 1. Usage: Do you use walkable neighbourhoods\* (or bicycle facilities or recreational  
51  
52 areas)?

53  
54  Yes (go to item 1.1)

No (go to item 1.2)

55  
56 1.1 How often do you use walkable neighbourhoods\* (or bicycle facilities or  
57  
58

recreational areas)?

Sometimes (1-2 days/week)       Often (3-4 days/week)

Always (5-7 days/week)

1.2 Why do you not use walkable neighbourhoods\* (or bicycle facilities or recreational areas)?

Not interested/dissatisfied       Unsafe

Unavailable/inconvenient       Other reason (please specify)

2. Quality: How do you rate the quality of walkable neighbourhoods\* (or bicycle facilities or recreational areas)?

An 11-point scale, with end-points at 0 (least) and 10 (most) will be provided.

3. Accessibility: How do you rate the accessibility of walkable neighbourhoods\* (or bicycle facilities or recreational areas)?

An 11-point scale, with end-points at 0 (least) and 10 (most) will be provided.

\* Walkable neighbourhoods or bicycle facilities or recreational areas

## Policy

We will collect the data on PA-promotion programmes for medical students from the School of Medicine annual plans and reports. The data will include the number and name of programmes or projects related to PA promotion for medical students. The investment related to PA (amount of expense) will be collected.

As part of the Thai national medical competencies issued by the Medical Council of Thailand, medical students have to learn about approaches to health promotion including

1  
2  
3 exercise.<sup>33</sup> The competencies do not specify particular aspects of PA education and training.  
4  
5 The school curriculum will be reviewed to determine metrics regarding the following topics:  
6  
7 (1) basic knowledge of PA – basic science of PA; (2) PA and public health – PA guidelines  
8  
9 and PA promotion in public health; and (3) PA counselling – tailored PA counselling for  
10  
11 healthy people and patients.  
12  
13

## 14 15 16 **Data analysis**

### 17 18 **People**

19  
20 We will reanalyse the data from the previous survey.<sup>14</sup> The prevalence of PA will be  
21  
22 calculated by dividing the number of participants who met the recommended PA levels by the  
23  
24 total number of participants. For each sex, the prevalence will be calculated by dividing the  
25  
26 number of a particular sex who met the recommended PA levels with the total number of the  
27  
28 same sex. The prevalence of PA for preclinical and clinical students will be classified.  
29  
30  
31

32  
33  
34 The prevalence of sedentary behaviours will be calculated by dividing the number of  
35  
36 participants who engage in  $\geq 8$  hours/day of sedentary time with the total number of  
37  
38 participants, the prevalence of sedentary behaviours for each sex, and the prevalence of  
39  
40 sedentary behaviours for preclinical and clinical students.  
41  
42  
43

### 44 45 **Place**

46  
47 We will use descriptive statistics, including frequencies and percentages, describing the usage  
48  
49 of walkable neighbourhoods, bicycle facilities, and recreational areas. The quality and  
50  
51 accessibility of walkable neighbourhoods, bicycle facilities, and recreational areas will be  
52  
53 calculated from the self-rating scales as mean scores to generate the fundamental and  
54  
55 comparable data among each place.  
56  
57  
58  
59  
60

## Policy

Two investigators will independently review the relevant documents to identify PA-promotion programmes for medical students. Two investigators will analyse the education metrics from the school curriculum for lectures, active learning sessions, or clinical teaching topics about basic knowledge of PA, the relationship of PA and public health, and PA counselling. Any differences in the analyses will be resolved through consensus. The analysis will confirmed by the research team members.

For the investment related to PA, we will calculate (1) the annual investment in PA programmes, (2) per capita investment (dividing the annual investment with the total number of medical students), and (3) ratio of per capita investment to annual tuition fee (dividing the per capita investment by the annual tuition fee).

## Development of the Medical School Physical Activity Report Card

The indicators of the MSPARC will consist of 5 parts: general information, people, places, policies, and surveillance (Table 1). We will design simple and concise report cards (Figure 1) in both Thai and English versions using uncomplicated symbols, infographics, and short texts.

**Table 1** Data indicators of the Medical School Physical Activity Report Card

|                     |                                  |
|---------------------|----------------------------------|
| General information | Land area (km <sup>2</sup> )     |
|                     | Number of students               |
|                     | Tuition fee (Baht/academic year) |

|                                                                                                                                                             |                                                                                                                                                                                                                                                                                                                                                                                                                                 |
|-------------------------------------------------------------------------------------------------------------------------------------------------------------|---------------------------------------------------------------------------------------------------------------------------------------------------------------------------------------------------------------------------------------------------------------------------------------------------------------------------------------------------------------------------------------------------------------------------------|
| <p>1<br/>2<br/>3<br/>4<br/>5<br/>6<br/>7<br/>8<br/>9<br/>10<br/>11<br/>12<br/>13<br/>14<br/>15<br/>16<br/>17<br/>18<br/>19<br/>20<br/>21</p> <p>People</p>  | <p>Prevalence of physical activity</p> <ul style="list-style-type: none"> <li>• Total (%)</li> <li>• Male (%)</li> <li>• Female (%)</li> </ul> <p>Prevalence of sedentary behaviours</p> <ul style="list-style-type: none"> <li>• Total (%)</li> <li>• Male (%)</li> <li>• Female (%)</li> </ul>                                                                                                                                |
| <p>22<br/>23<br/>24<br/>25<br/>26<br/>27<br/>28<br/>29<br/>30<br/>31<br/>32<br/>33<br/>34<br/>35<br/>36<br/>37<br/>38<br/>39<br/>40<br/>41</p> <p>Place</p> | <p>Walkable neighbourhoods</p> <ul style="list-style-type: none"> <li>• Quality (mean score)</li> <li>• Accessibility (mean score)</li> </ul> <p>Bicycle facilities</p> <ul style="list-style-type: none"> <li>• Quality (mean score)</li> <li>• Accessibility (mean score)</li> </ul> <p>Recreational areas</p> <ul style="list-style-type: none"> <li>• Quality (mean score)</li> <li>• Accessibility (mean score)</li> </ul> |
| <p>42<br/>43<br/>44<br/>45<br/>46<br/>47<br/>48<br/>49<br/>50<br/>51<br/>52<br/>53<br/>54<br/>55<br/>56<br/>57<br/>58<br/>59<br/>60</p> <p>Policy</p>       | <p>Physical activity promotion programmes for medical students</p> <ul style="list-style-type: none"> <li>• Yes/No</li> <li>• Number</li> <li>• Programme names</li> </ul> <p>Education metrics</p> <ul style="list-style-type: none"> <li>• Basic knowledge of physical activity (Yes/No)</li> <li>• Physical activity and public health (Yes/No)</li> </ul>                                                                   |

|              |                                                                                                                                                                                                                                                                                                                                 |
|--------------|---------------------------------------------------------------------------------------------------------------------------------------------------------------------------------------------------------------------------------------------------------------------------------------------------------------------------------|
|              | <ul style="list-style-type: none"> <li>• Physical activity counselling (Yes/No)</li> </ul> <p>Investment related to physical activity</p> <ul style="list-style-type: none"> <li>• Annual investment (Baht/year)</li> <li>• Per capita investment (Baht/student)</li> <li>• Per capita investment/annual tuition fee</li> </ul> |
| Surveillance | <p>First survey (year)</p> <p>Recent survey (year)</p> <p>Next survey (year)</p>                                                                                                                                                                                                                                                |

## ETHICS AND DISSEMINATION

This study has been approved by the Human Research Ethics Committee of Walailak University (protocol number: WUEC-16-005-01) and the study will comply with the Declaration of Helsinki. Participation will be entirely voluntary, and medical students are free to refuse to become subjects in the study. This will not result in any penalty. Information about the research will be provided and the informed consent will be taken by asking the participants to indicate their agreement to participate by written informed-consent forms. The participants' information and responses will be strictly confidential and we will protect the participants' anonymity.

The MSPARC will be presented to the faculty committee via a staff meeting. We will provide the visualised report card at the main office of School of Medicine. Medical students will be informed via the faculty website and social media. The final report and results will be forwarded to the grant funder (Walailak University), key stakeholders, and policymakers of the university. The findings and tool (MSPARC) of the study will be disseminated to scholars



1  
2  
3 and researchers through peer-reviewed journals as well as national and international  
4  
5 conferences.  
6  
7

## 8 9 **DISCUSSION**

10  
11 This study will analyse the prevalence of regular physical activity in students at a Thai  
12  
13 medical school. The results will be presented via the MSPARC, which provides concise data.  
14  
15 It may help to communicate scientific and public health data at a glance. Information on the  
16  
17 prevalence of PA and sedentary behaviours will be the initial information for defining future  
18  
19 goals to improve student health. The quality and accessibility of walkable neighbourhoods,  
20  
21 bicycle facilities and recreational areas will help the medical school administration  
22  
23 understand the underlying limitations of PA-related environments. This will lead to the in-  
24  
25 depth exploration of a particular problem. According to the policy, the data about PA-  
26  
27 promotion programmes will show the current activities and concerns about medical students'  
28  
29 health. Education metrics will reflect the comprehensiveness of the school curriculum  
30  
31 regarding knowledge and practice as well as the need for additional teaching. The  
32  
33 information on investment related to PA will indicate the adequacy of the budget for PA  
34  
35 promotion. Lastly, the surveillance information will collect the first, recent and future surveys  
36  
37 in the medical school. These could be the milestones for evaluating and monitoring PA  
38  
39 prevalence in the medical school.  
40  
41  
42  
43  
44  
45  
46  
47  
48

49 A key limitation is that this cross-sectional study will be initially conducted in only one  
50  
51 medical school. However, this protocol and the MSPARC can be adopted for future surveys  
52  
53 and extended to other medical schools. For example, other medical schools can objectively  
54  
55 measure PA and sedentary behaviours using pedometers or accelerometers instead of using  
56  
57 the GPAQ. The MSPARC, which is based on the PA metrics, will enable comparison and  
58  
59  
60

1  
2  
3 evaluation among medical schools. Nevertheless, there is a need to evaluate the effectiveness  
4  
5 and feasibility of the MSPARC. An implementation study will be necessary prior to future  
6  
7 surveys. On a larger scale, regional or national concerns can help develop a strategy to  
8  
9 strengthen collaboration among medical schools or promote PA in their own settings.  
10  
11

### 12 13 14 15 **Acknowledgements** 16

17  
18 We thank Steve Melville for English language editing.  
19  
20

### 21 22 23 24 **Contributors** 25

26  
27 AW and ST initiated the idea for the project and developed the study design. SV, US, and  
28  
29 WA provided advice for the study design. PP was responsible for supervision of project. AW  
30  
31 wrote early drafts of the manuscript. All the authors read and approved the final draft of the  
32  
33 manuscript.  
34  
35

### 36 37 38 39 **Funding** 40

41  
42 This work was supported by Walailak University grant number WUDPL60001.  
43  
44  
45

### 46 47 48 **Competing interests** 49

50  
51 None declared.  
52  
53  
54

### 55 56 57 **Data sharing statement** 58 59 60

1  
2  
3 No additional data are available.  
4  
5  
6  
7

8  
9 **Figure legends**

10  
11 Figure 1 Example of the Medical School Physical Activity Report Card (MSPARC).  
12  
13  
14  
15  
16  
17  
18  
19  
20  
21  
22  
23  
24  
25  
26  
27  
28  
29  
30  
31  
32  
33  
34  
35  
36  
37  
38  
39  
40  
41  
42  
43  
44  
45  
46  
47  
48  
49  
50  
51  
52  
53  
54  
55  
56  
57  
58  
59  
60

## REFERENCES

1. Sallis JF, Bull F, Guthold R, et al. Progress in physical activity over the Olympic quadrennium. *The Lancet* 2016;388(10051):1325-36.
2. Ding D, Lawson KD, Kolbe-Alexander TL, et al. The economic burden of physical inactivity: a global analysis of major non-communicable diseases. *The Lancet* 2016;388(10051):1311-24.
3. GBD 2015 Risk Factors Collaborators. Global, regional, and national comparative risk assessment of 79 behavioural, environmental and occupational, and metabolic risks or clusters of risks, 1990-2015: a systematic analysis for the Global Burden of Disease Study 2015. *The Lancet* 2016;388(10053):1659-724.
4. World Health Organization. Physical activity: World Health Organization. <http://www.who.int/mediacentre/factsheets/fs385/en/> (accessed 25 Jan 2017).
5. World Health Organization. Global recommendations on physical activity for health. Geneva, Switzerland: World Health Organization, 2010.
6. Bauman AE, Reis RS, Sallis JF, et al. Correlates of physical activity: why are some people physically active and others not? *The Lancet* 2012;380(9838):258-71.
7. McLeroy KR, Bibeau D, Steckler A, Glanz K. An ecological perspective on health promotion programs. *Health Educ Q* 1988;15(4):351-77.
8. Reis RS, Salvo D, Ogilvie D, et al. Scaling up physical activity interventions worldwide: stepping up to larger and smarter approaches to get people moving. *The Lancet* 2016;388(10051):1337-48.
9. Global Observatory for Physical Activity. Physical activity country card: Thailand: Global Observatory for Physical Activity. <http://www.globalphysicalactivityobservatory.com/card/?country=TH> (accessed 25 Jan 2017).

10. Thai Health Promotion Foundation, eds. Abstract book 1st National Conference on Physical Activity; Bangkok, Thailand: Thai Health Promotion Foundation, 2015.
11. International Society for Physical Activity and Health. The 6th ISPAH Congress: International Society for Physical Activity and Health. <http://www.ispah.org/congress/> (accessed 25 Jan 2017).
12. Bangkok Post. Civil servants to exercise every Wednesday: Bangkok Post. <http://m.bangkokpost.com/news/general/1141689/civil-servants-to-exercise-every-wednesday> (accessed 25 Jan 2017).
13. International Society for Physical Activity and Health. The Bangkok Declaration on Physical Activity for Global Health and Sustainable development: International Society for Physical Activity and Health. <http://www.ispah.org/resources> (accessed 25 Jan 2017).
14. Wattanapisit A, Fungthongcharoen K, Saengow U, et al. Physical activity among medical students in Southern Thailand: a mixed methods study. *BMJ open* 2016;6(9):e013479.
15. Lobelo F, Duperly J, Frank E. Physical activity habits of doctors and medical students influence their counselling practices. *Br J Sports Med* 2009;43(2):89-92.
16. Stanford FC, Durkin MW, Stallworth JR, et al. Factors that influence physicians' and medical students' confidence in counseling patients about physical activity. *J Prim Prev* 2014;35:193–201.
17. Stoutenberg M, Stasi S, Stamatakis E, et al. Physical activity training in US medical schools: Preparing future physicians to engage in primary prevention. *Phys Sportsmed* 2015;43(4):388-94.
18. Weiler R, Chew S, Coombs N, et al. Physical activity education in the undergraduate curricula of all UK medical schools: are tomorrow's doctors equipped to follow clinical guidelines? *Br J Sports Med* 2012;46(14):1024-6.

- 1  
2  
3 19. Global Observatory for Physical Activity. Project mission and methods: Global  
4  
5 Observatory for Physical Activity.  
6  
7 <http://www.globalphysicalactivityobservatory.com/project-description/> (accessed 30 Jan  
8  
9 2017).  
10
- 11 20. Hallal P, Ramirez A. The Lancet Physical Activity Observatory : monitoring a 21st  
12  
13 century pandemic. *Res Exerc Epidemiol* 2015;17(1):1-5.  
14
- 15 21. Tremblay MS, Gonzalez SA, Katzmarzyk PT, et al. Physical activity report cards:  
16  
17 Active Healthy Kids Global Alliance and The Lancet Physical Activity Observatory. *J Phys*  
18  
19 *Act Health* 2015;12(3):297-8.  
20
- 21 22. Barnes JD, Cameron C, Carson V, et al. Results From Canada's 2016  
22  
23 ParticipACTION Report Card on Physical Activity for Children and Youth. *J Phys Act*  
24  
25 *Health* 2016;13(11 Suppl 2):S110-s6.  
26  
27
- 28 23. Tremblay MS, Barnes JD, Cowie Bonne J. Impact of the Active Healthy Kids Canada  
29  
30 report card: a 10-year analysis. *J Phys Act Health* 2014;11(Suppl 1):S3-s20.  
31  
32
- 33 24. Creswell JW. *Qualitative inquiry and research design : choosing among five*  
34  
35 *approaches*. 3 ed. Los Angeles, United States of America: SAGE, 2013.  
36  
37 [http://www.who.int/chp/steps/resources/GPAQ\\_Analysis\\_Guide.pdf](http://www.who.int/chp/steps/resources/GPAQ_Analysis_Guide.pdf) (accessed 30 Jan 2017).  
38  
39
- 40 25. World Health Organization. *Global Physical Activity Questionnaire (GPAQ) Analysis*  
41  
42 *Guide*: World Health Organization.  
43  
44
- 45 26. van der Ploeg HP, Chey T, Korda RJ, et al. Sitting time and all-cause mortality risk in  
46  
47 222 497 Australian adults. *Arch Intern Med* 2012;172(6):494-500.  
48
- 49 27. Win AM, Yen LW, Tan KH, et al. Patterns of physical activity and sedentary  
50  
51 behavior in a representative sample of a multi-ethnic South-East Asian population: a cross-  
52  
53 sectional study. *BMC public health* 2015;15:318.  
54  
55  
56  
57  
58  
59  
60

- 1  
2  
3 28. Sallis JF, Frank LD, Saelens BE, et al. Active transportation and physical activity:  
4 opportunities for collaboration on transportation and public health research. *Transp Res Part*  
5 *A Policy Pract* 2004;38(4):249-68.  
6  
7  
8  
9  
10 29. Hurd AR, Anderson DM. *The park and recreation professional's handbook*. Illinois,  
11 United States of America: Human Kinetics, 2011.  
12  
13 30. Sundquist K, Eriksson U, Kawakami N, et al. Neighborhood walkability, physical  
14 activity, and walking behavior: The Swedish Neighborhood and Physical Activity (SNAP)  
15 study. *Soc Sci Med* 2011;72(8):1266-73.  
16  
17  
18  
19  
20 31. Wei Y, Xiao W, Wen M, et al. Walkability, Land Use and Physical Activity.  
21 *Sustainability* 2016;8(1):65.  
22  
23  
24 32. White MP, Elliott LR, Taylor T, et al. Recreational physical activity in natural  
25 environments and implications for health: A population based cross-sectional study in  
26 England. *Prev Med* 2016;91:383-8.  
27  
28  
29  
30  
31 33. Medical Council of Thailand. *Medical Competency Assessment Criteria for National*  
32 *License* 2012. Bangkok, Thailand: Medical Council of Thailand, 2012.  
33  
34  
35  
36  
37  
38  
39  
40  
41  
42  
43  
44  
45  
46  
47  
48  
49  
50  
51  
52  
53  
54  
55  
56  
57  
58  
59  
60

1  
2  
3  
4  
5  
6  
7  
8  
9  
10  
11  
12  
13  
14  
15  
16  
17  
18  
19  
20  
21  
22  
23  
24  
25  
26  
27  
28  
29  
30  
31  
32  
33  
34  
35  
36  
37  
38  
39  
40  
41  
42  
43  
44  
45  
46  
47  
48  
49  
50  
51  
52  
53  
54  
55  
56  
57  
58  
59  
60

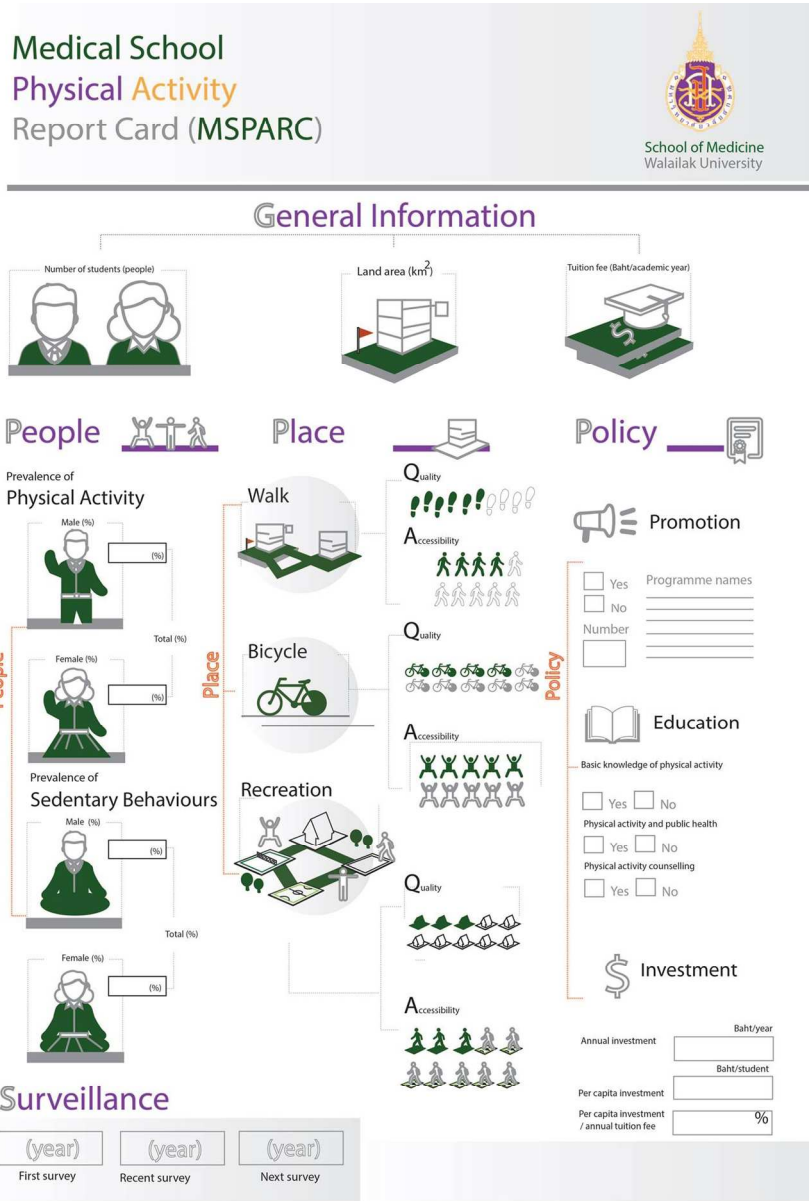

Figure 1 Example of the Medical School Physical Activity Report Card (MSPARC).

122x173mm (300 x 300 DPI)
